# Supplementary material
Source: publisher site journal article supplement (https://www.degruyterbrill.com/publication/isbn/9783110364729/downloadAsset/9783110364729_List-of-Figures-and-Tables.pdf)
Supplement: Supplementary file 1 [file 9783110364729_List-of-Figures-and-Tables.pdf]

# **Mathematik – Lehrbuch**

Otto Opitz / Robert Klein

ISBN: 978-3-11-036471-2

© 2014 Walter de Gruyter GmbH, Berlin/München/Boston

**Abbildungsübersicht / List of Figures**

**Tabellenübersicht / List of Tables**

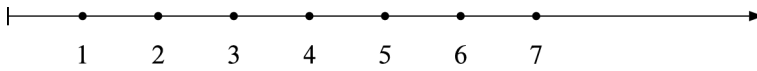

**Figur 1.1:** Zahlenstrahl und natürliche Zahlen

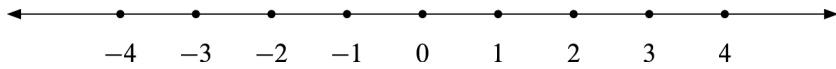

**Figur 1.2:** Zahlengerade und ganze Zahlen

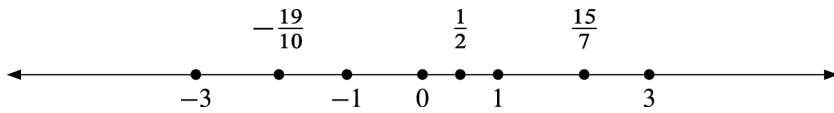

**Figur 1.3:** Zahlengerade und rationale Zahlen

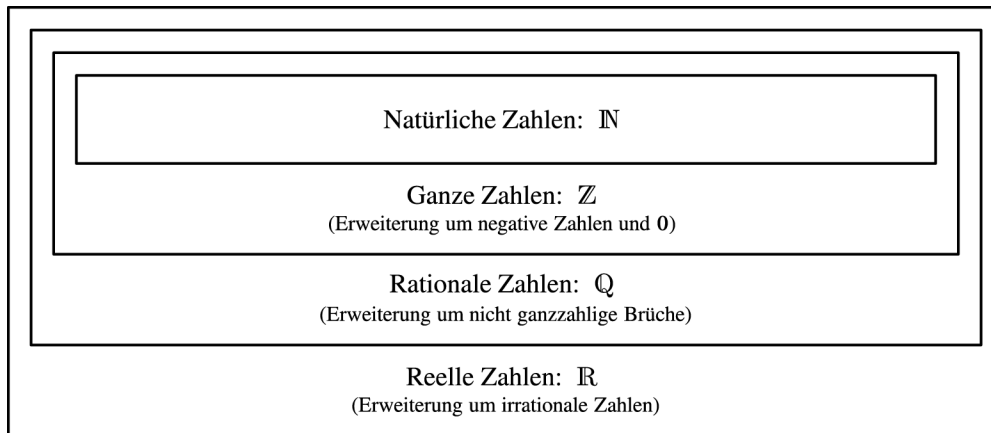

**Figur 1.4:** Hierarchischer Aufbau des Zahlensystems

| Maschinenzeiten<br>je Einheit | Produkte |          |          |          |
|-------------------------------|----------|----------|----------|----------|
|                               | $P_1$    | $P_2$    | $\dots$  | $P_n$    |
| Maschinen $M_1$               | $z_{11}$ | $z_{12}$ | $\dots$  | $z_{1n}$ |
| $M_2$                         | $z_{21}$ | $z_{22}$ | $\dots$  | $z_{2n}$ |
| $\vdots$                      | $\vdots$ | $\vdots$ | $\ddots$ | $\vdots$ |
| $M_m$                         | $z_{m1}$ | $z_{m2}$ | $\dots$  | $z_{mn}$ |

**Figur 1.5:** Doppelindizierung von Zahlen

|               | Binomialkoeffizienten |                  |                    |                  |                    |                |
|---------------|-----------------------|------------------|--------------------|------------------|--------------------|----------------|
| $(a+b)^0$     | 1                     |                  |                    |                  |                    |                |
| $(a+b)^1$     | 1 1                   |                  |                    |                  |                    |                |
| $(a+b)^2$     | 1 2 1                 |                  |                    |                  |                    |                |
| $(a+b)^3$     | 1 3 3 1               |                  |                    |                  |                    |                |
| $(a+b)^4$     | 1 4 6 4 1             |                  |                    |                  |                    |                |
| $(a+b)^5$     | 1 5 10 10 5 1         |                  |                    |                  |                    |                |
| $\vdots$      | $\vdots$              |                  |                    |                  |                    |                |
| $(a+b)^n$     | $\binom{n}{0}$        | $\binom{n}{1}$   | $\binom{n}{k}$     | $\binom{n}{k+1}$ | $\binom{n}{n-1}$   | $\binom{n}{n}$ |
| $(a+b)^{n+1}$ | $\binom{n+1}{0}$      | $\binom{n+1}{1}$ | $\binom{n+1}{k+1}$ | $\binom{n+1}{n}$ | $\binom{n+1}{n+1}$ |                |
| $\vdots$      | $\vdots$              |                  | $\vdots$           |                  | $\vdots$           |                |

**Figur 1.6:** Zahlendreieck nach Pascal (1623–1662)

| Kombinationen $k$ -ter Ordnung aus $n$ Objekten |                             |                                  |
|-------------------------------------------------|-----------------------------|----------------------------------|
|                                                 | mit Wiederholung            | ohne Wiederholung ( $k \leq n$ ) |
| mit Reihenfolge                                 | $n^k$ (Fall a)              | $\frac{n!}{(n-k)!}$ (Fall b)     |
| ohne Reihenfolge                                | $\binom{n+k-1}{k}$ (Fall d) | $\binom{n}{k}$ (Fall c)          |

**Figur 1.7:** Kombinationen  $k$ -ter Ordnung aus  $n$  Objekten



|        |        |        |        |        |        |
|--------|--------|--------|--------|--------|--------|
| (1, 1) | (1, 2) | (1, 3) | (1, 4) | (1, 5) | (1, 6) |
| (2, 1) | (2, 2) | (2, 3) | (2, 4) | (2, 5) | (2, 6) |
| (3, 1) | (3, 2) | (3, 3) | (3, 4) | (3, 5) | (3, 6) |
| (4, 1) | (4, 2) | (4, 3) | (4, 4) | (4, 5) | (4, 6) |
| (5, 1) | (5, 2) | (5, 3) | (5, 4) | (5, 5) | (5, 6) |
| (6, 1) | (6, 2) | (6, 3) | (6, 4) | (6, 5) | (6, 6) |

**Figur 1.8:** Wurfergebnisse mit zwei Würfeln

| Rechenregel                                         | Gleichung $A_1 = A_2$                          | Ungleichung $A_1 \leq A_2$                           |
|-----------------------------------------------------|------------------------------------------------|------------------------------------------------------|
| Vertauschen der Seiten                              | $A_2 = A_1$                                    | $A_2 \geq A_1$                                       |
| Addition oder Subtraktion<br>eines Terms $B$        | $A_1 + B = A_2 + B$<br>$A_1 - B = A_2 - B$     | $A_1 + B \leq A_2 + B$<br>$A_1 - B \leq A_2 - B$     |
| Multiplikation oder Division<br>eines Terms $B > 0$ | $A_1 \cdot B = A_2 \cdot B$<br>$A_1/B = A_2/B$ | $A_1 \cdot B \leq A_2 \cdot B$<br>$A_1/B \leq A_2/B$ |
| Multiplikation oder Division<br>eines Terms $B < 0$ | $A_1 \cdot B = A_2 \cdot B$<br>$A_1/B = A_2/B$ | $A_1 \cdot B \geq A_2 \cdot B$<br>$A_1/B \geq A_2/B$ |

**Figur 1.9:** Rechenregeln zur Lösung von Gleichungen und Ungleichungen mit einer Variablen

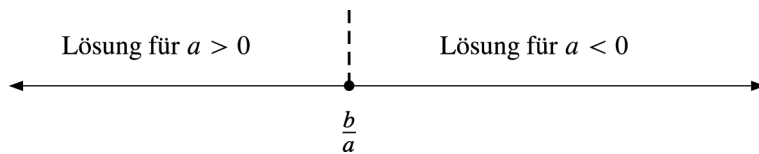

**Figur 1.10:** Lösungen der Ungleichung  $ax - b \leq 0$

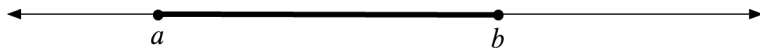

**Figur 1.11:** Abgeschlossenes Intervall der Zahlengeraden

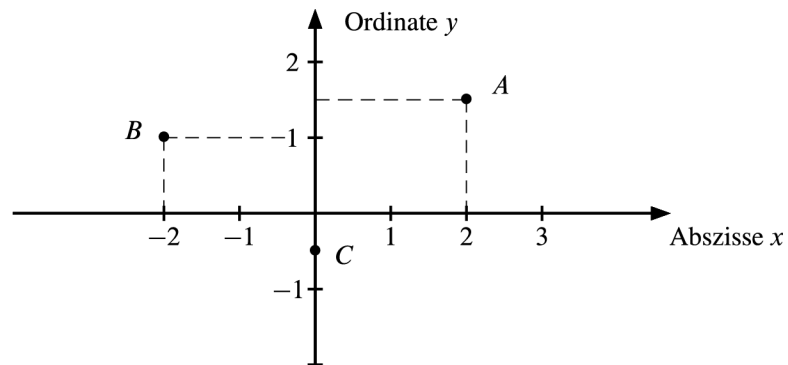

Man erhält die Koordinaten:

|           |            |      |                      |           |     |
|-----------|------------|------|----------------------|-----------|-----|
| $x = 2,$  | $y = 1.5$  | oder | $(x, y) = (2, 1.5)$  | für Punkt | $A$ |
| $x = -2,$ | $y = 1$    | oder | $(x, y) = (-2, 1)$   | für Punkt | $B$ |
| $x = 0,$  | $y = -0.5$ | oder | $(x, y) = (0, -0.5)$ | für Punkt | $C$ |

**Figur 1.12:** Punkte im kartesischen Koordinatensystem

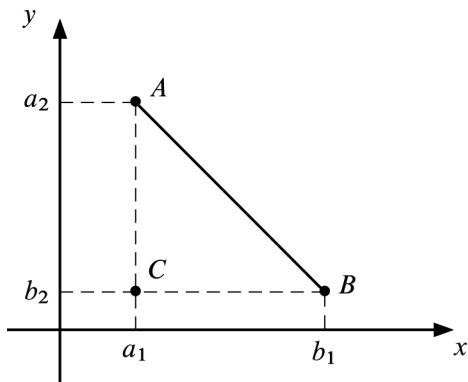

**Figur 1.13:** Strecke als Verbindung zweier Punkte

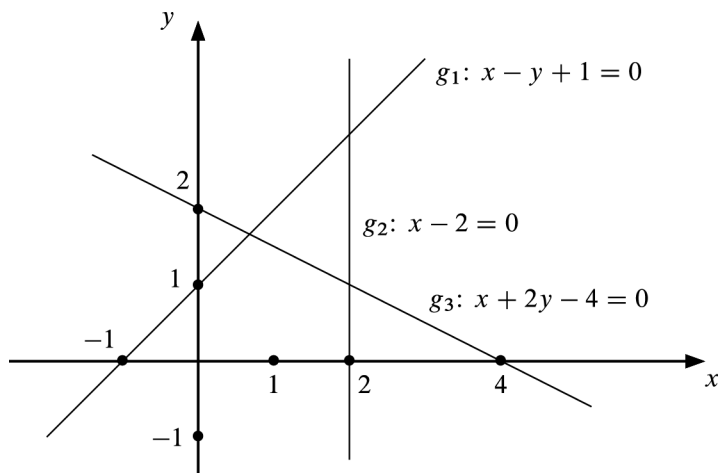

**Figur 1.14:** Graphische Darstellung der Gleichungen  $g_1$ ,  $g_2$ ,  $g_3$

| Konstanten        | Geradengleichung | Geradenverlauf          |
|-------------------|------------------|-------------------------|
| $a = 0, b \neq 0$ | $by + c = 0$     | parallel zur $x$ -Achse |
| $a \neq 0, b = 0$ | $ax + c = 0$     | parallel zur $y$ -Achse |
| $c = 0$           | $ax + by = 0$    | durch den Nullpunkt     |

**Figur 1.15:** Spezielle Geraden der Ebene



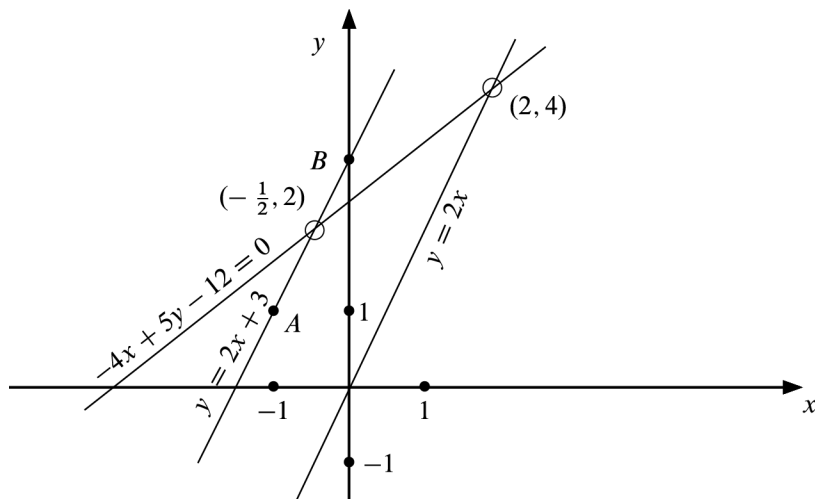

**Figur 1.16:** Beispiele für Geradenschnittpunkte

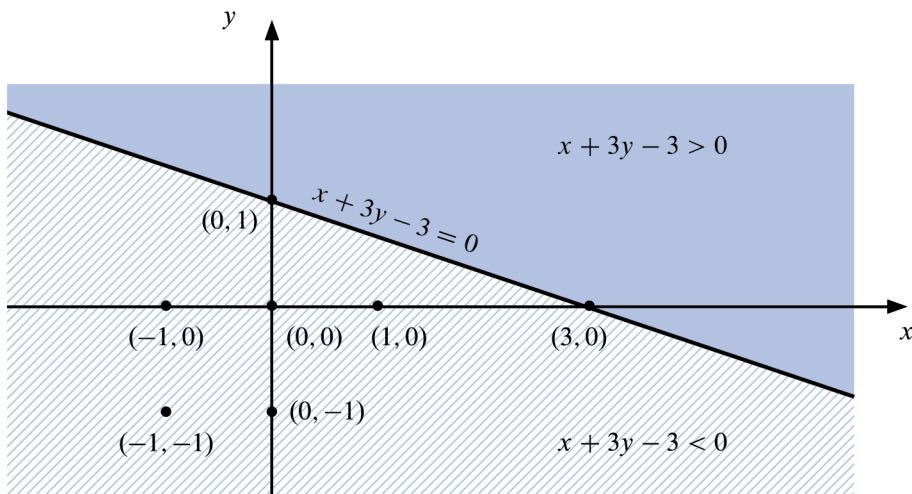

**Figur 1.17:** Beispiele linearer Ungleichungen und Halbebenen

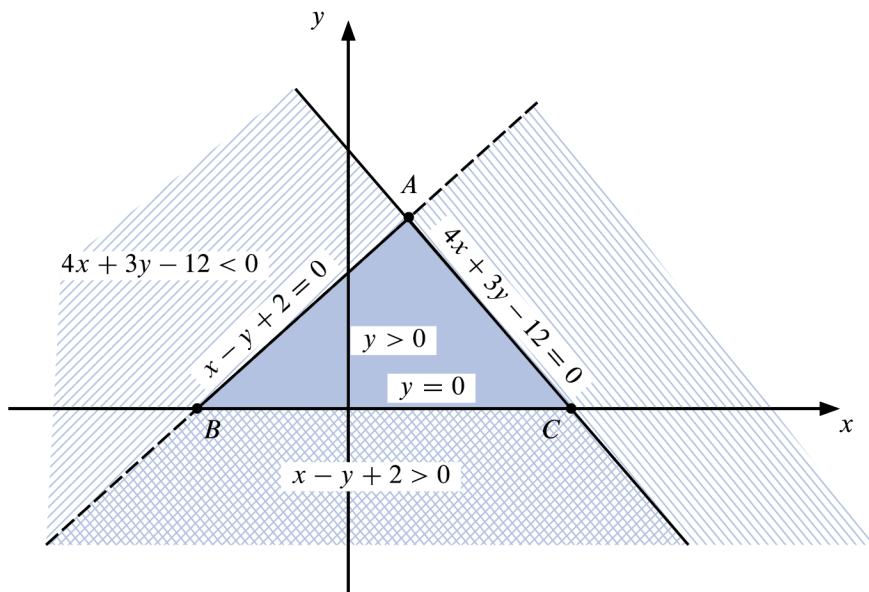

**Figur 1.18:** Gemeinsamer Bereich dreier Halbebenen

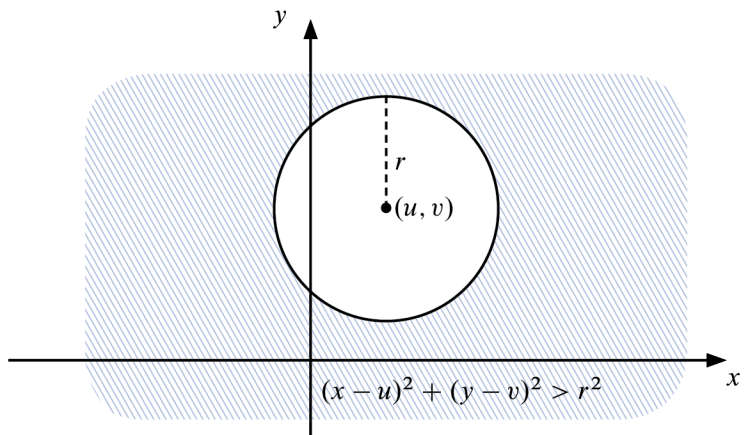

**Figur 1.19:** Kreis mit der Gleichung  $(x - u)^2 + (y - v)^2 = r^2$

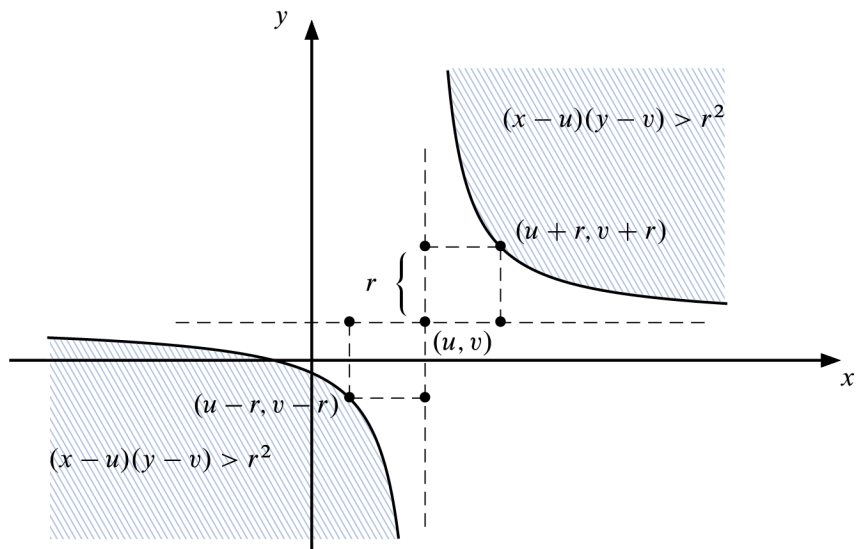

**Figur 1.20:** Hyperbel mit der Gleichung  $(x-u)(y-v) = r^2$

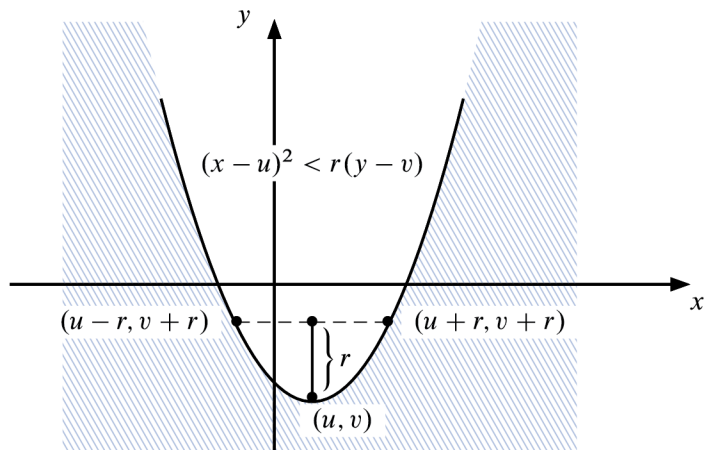

**Figur 1.21:** Parabel mit der Gleichung  $(x - u)^2 = r(y - v)$ ,  $r > 0$

**Figur 1.22:** Parabel zur Gleichung  $g_1$ , Bereiche zu den Ungleichungen  $h_1, h_2$

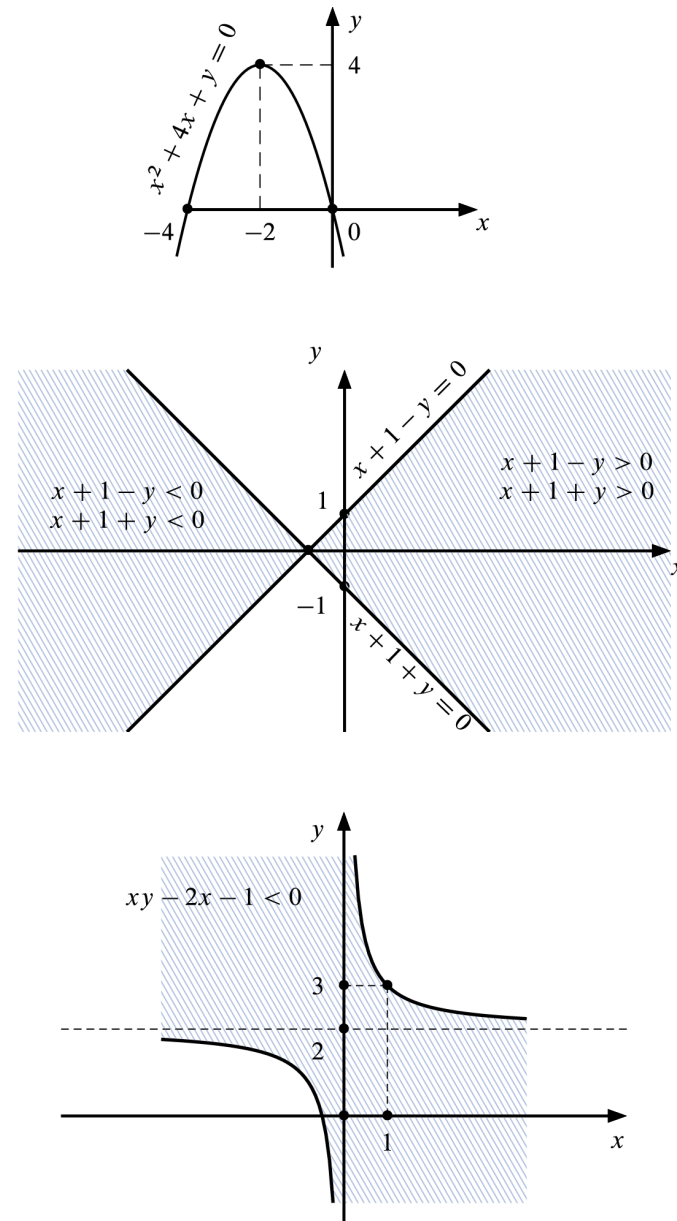

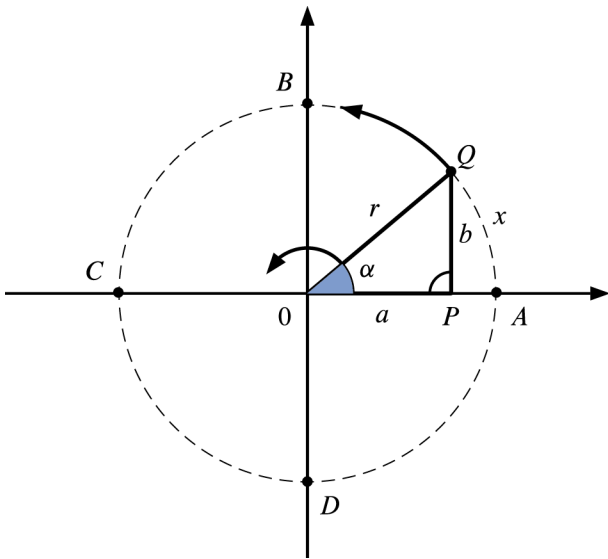

**Figur 1.23:** Trigonometrie am Kreis



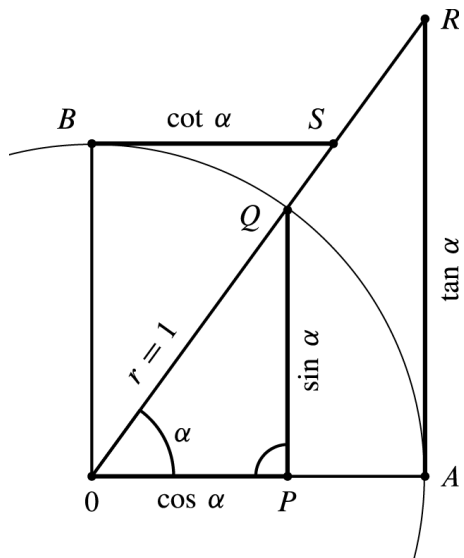

**Figur 1.24:** Sinus, Kosinus, Tangens und Kotangens im Einheitskreis

| $\alpha$                               | $\sin \alpha$ | $\cos \alpha$ | $\tan \alpha$ | $\cot \alpha$ |
|----------------------------------------|---------------|---------------|---------------|---------------|
| $0^\circ$                              | 0             | 1             | 0             |               |
| $\langle 0^\circ, 90^\circ \rangle$    | +             | +             | +             | +             |
| $90^\circ$                             | 1             | 0             |               | 0             |
| $\langle 90^\circ, 180^\circ \rangle$  | +             | −             | −             | −             |
| $180^\circ$                            | 0             | −1            | 0             |               |
| $\langle 180^\circ, 270^\circ \rangle$ | −             | −             | +             | +             |
| $270^\circ$                            | −1            | 0             |               | 0             |
| $\langle 270^\circ, 360^\circ \rangle$ | −             | +             | −             | −             |
| $360^\circ$                            | 0             | 1             | 0             |               |
| $\langle 360^\circ, 450^\circ \rangle$ | +             | +             | +             | +             |
| $450^\circ$                            | 1             | 0             |               | 0             |
| $\vdots$                               | $\vdots$      | $\vdots$      | $\vdots$      | $\vdots$      |

**Figur 1.25:** Vorzeichen und Werte von  $\sin \alpha$ ,  $\cos \alpha$ ,  $\tan \alpha$ ,  $\cot \alpha$

| $\alpha$   | $\sin \alpha$ | $\cos \alpha$ | $\tan \alpha$ | $\cot \alpha$ |
|------------|---------------|---------------|---------------|---------------|
| $0^\circ$  | 0             | 1             | 0             |               |
| $30^\circ$ | $1/2$         | $\sqrt{3}/2$  | $\sqrt{3}/3$  | $\sqrt{3}$    |
| $45^\circ$ | $\sqrt{2}/2$  | $\sqrt{2}/2$  | 1             | 1             |
| $60^\circ$ | $\sqrt{3}/2$  | $1/2$         | $\sqrt{3}$    | $\sqrt{3}/3$  |
| $90^\circ$ | 1             | 0             |               | 0             |

**Figur 1.26:** Werte für  $\sin \alpha$ ,  $\cos \alpha$ ,  $\tan \alpha$ ,  $\cot \alpha$  mit  $\alpha$  aus  $[0^\circ, 90^\circ]$ .

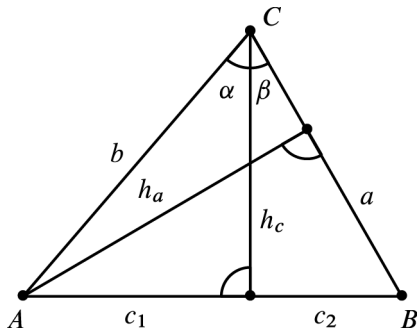

**Figur 1.27:** Zur Bestätigung von  $\sin(\alpha + \beta) = \sin \alpha \cos \beta + \cos \alpha \sin \beta$

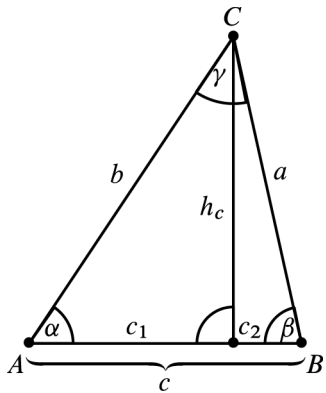

**Figur 1.28:** Zur Darstellung des Sinus- und Kosinussatzes

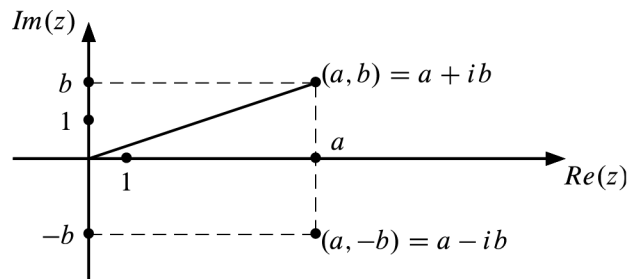

**Figur 1.29:** Geometrische Darstellung komplexer Zahlen

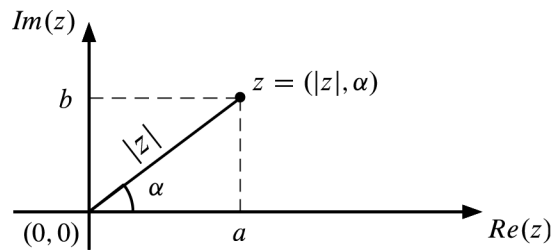

**Figur 1.30:** Polarkoordinaten für komplexe Zahlen

| A         | w | f |
|-----------|---|---|
| $\bar{A}$ | f | w |

**Figur 2.1:** Wahrheitstabelle der Negation



|                                |   |   |   |   |
|--------------------------------|---|---|---|---|
| <b>A</b>                       | w | w | f | f |
| <b>B</b>                       | w | f | w | f |
| <b><math>A \wedge B</math></b> | w | f | f | f |

**Figur 2.2:** Wahrheitstabelle der Konjunktion

|                              |   |   |   |   |
|------------------------------|---|---|---|---|
| <b>A</b>                     | w | w | f | f |
| <b>B</b>                     | w | f | w | f |
| <b><math>A \vee B</math></b> | w | w | w | f |

**Figur 2.3:** Wahrheitstabelle der Disjunktion

|                                     |   |   |   |   |
|-------------------------------------|---|---|---|---|
| <b>A</b>                            | w | w | f | f |
| <b>B</b>                            | w | f | w | f |
| <b><math>A \Rightarrow B</math></b> | w | f | w | w |

**Figur 2.4:** Wahrheitstabelle der Implikation

|                              |   |   |   |   |
|------------------------------|---|---|---|---|
| <b>A</b>                     | w | w | f | f |
| <b>B</b>                     | w | f | w | f |
| <b><math>A \iff B</math></b> | w | f | f | w |

**Figur 2.5:** Wahrheitstabelle der Äquivalenz

| Priorität | Grundrechenarten | logische Operationen     |
|-----------|------------------|--------------------------|
| 1         | Potenzieren      | Negation                 |
| 2         | Multiplizieren   | Konjunktion, Disjunktion |
| 3         | Addieren         | Implikation, Äquivalenz  |

**Figur 2.6:** Prioritäten der logischen Operationen

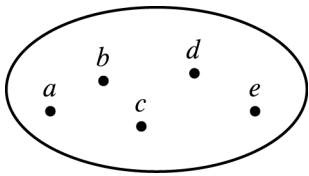

**Figur 3.1:** Venndiagramm der Menge  $\{a, b, c, d, e\}$

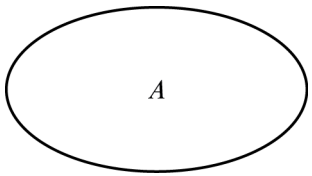

**Figur 3.2:** Venndiagramm der Menge  $A$

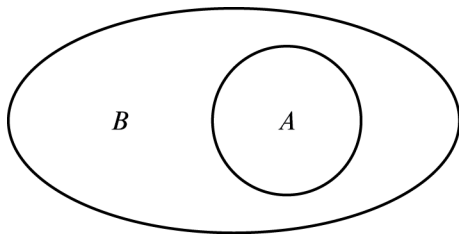

**Figur 3.3:** Teilmenge  $A \subset B$



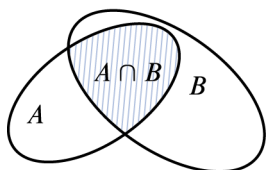

**Figur 3.4:** Schnittmenge  $A \cap B$

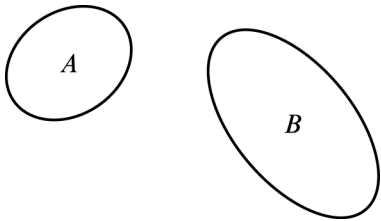

**Figur 3.5:** Disjunkte Mengen  $A$ ,  $B$

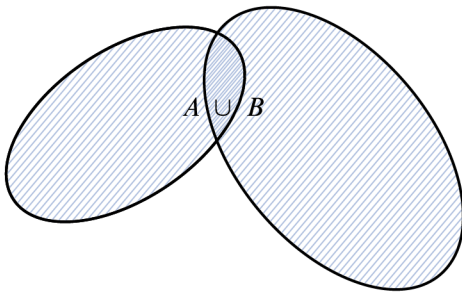

**Figur 3.6:** Vereinigungsmenge  $A \cup B$

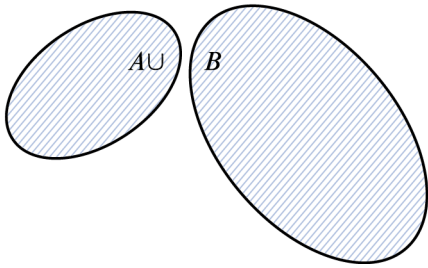

**Figur 3.7:** Vereinigung disjunkter Mengen  $A, B$

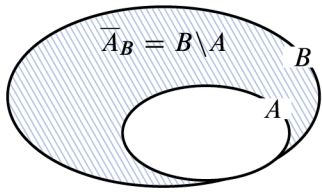

**Figur 3.8:** Komplementärmenge von  $A$  bzgl.  $B$

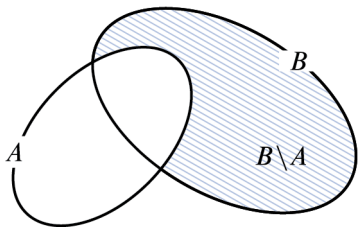

**Figur 3.9:** Differenzmenge von  $B$  und  $A$

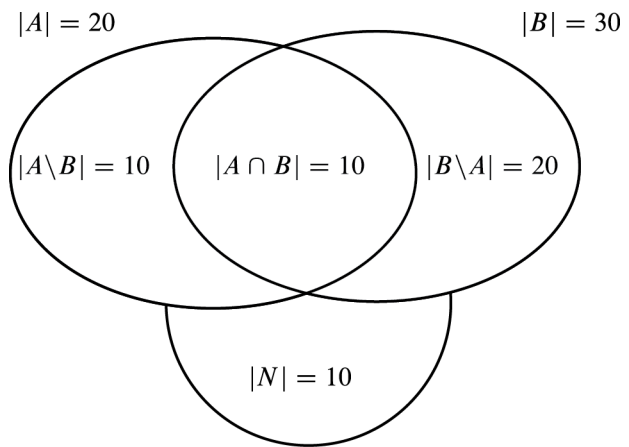

**Figur 3.10:** Venndiagramm zu Beispiel 3.25

| Priorität | logische Operationen     | Mengenoperationen         |
|-----------|--------------------------|---------------------------|
| 1         | Negation                 | Komplement, Differenz     |
| 2         | Konjunktion, Disjunktion | Durchschnitt, Vereinigung |
| 3         | Implikation, Äquivalenz  | Teilmenge, Identität      |

**Figur 3.11:** Prioritäten der Mengenoperationen



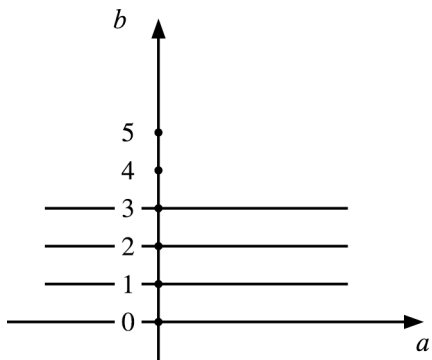

Figur 4.1: Menge  $A \times B = \{(a, b) : a \in \mathbb{R}, b \in \mathbb{N}\}$

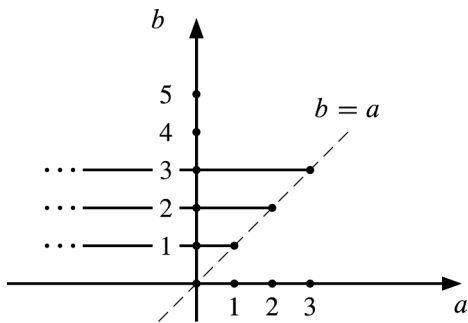

Figur 4.2: Graph der Relation  $R = \{(a, b) \in \mathbb{R} \times \mathbb{N} : a \leq b\}$

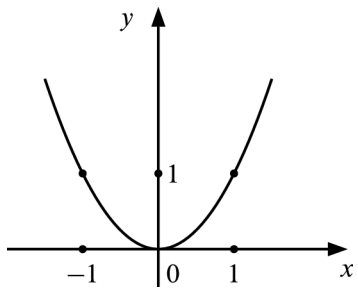

Figur 4.3: Graph der Relation  $R = \{(x, y) \in \mathbb{R}^2 : y = x^2\}$

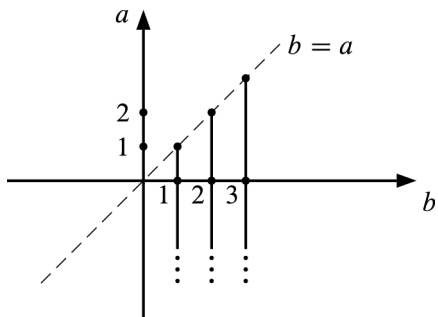

Figur 4.4: Graph der Relation  $R^{-1} = \{(b, a) \in \mathbb{N} \times \mathbb{R} : a \leq b\}$

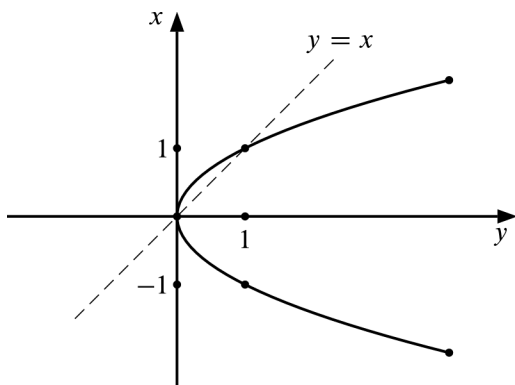

Figur 4.5: Graph der Relation  $R^{-1} = \{(y, x) \in \mathbb{R}^2 : y = x^2\}$

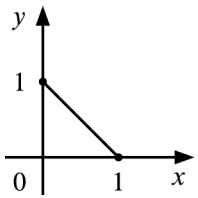

Figur 4.6:  $R = \{(x, y) \in \mathbb{R}_+^2 : x + y = 1\}$

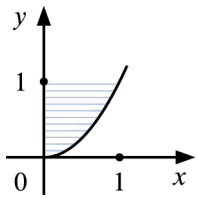

**Figur 4.7:**  $S = \{(x, y) \in \mathbb{R}_+^2 : y \geq x^2\}$

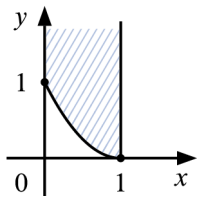

**Figur 4.8:**  $S \circ R = \{(x, y) \in \mathbb{R}_+^2 : y \geq (1 - x)^2 \wedge x \in [0, 1]\}$



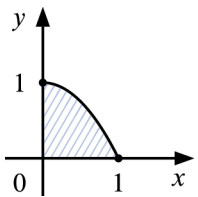

Figur 4.9:  $R \circ S = \{(x, y) \in \mathbb{R}_+^2 : y \leq 1 - x^2\}$

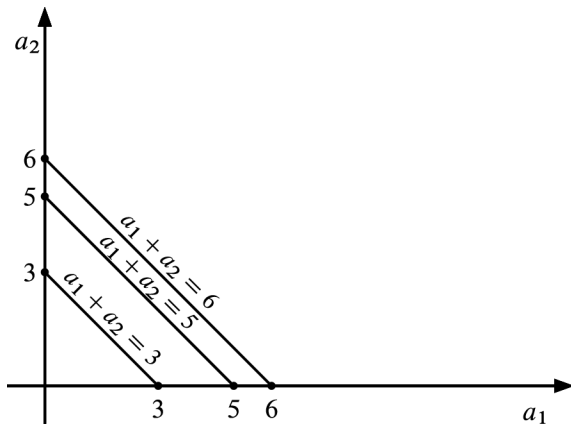

**Figur 4.10:** Isonutzenlinien für  $a_1 + a_2 = c$

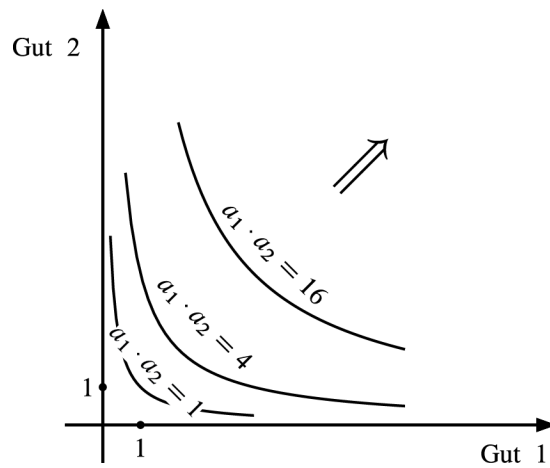

**Figur 4.11:** Isonutzenkurven für  $a_1 a_2 = c$

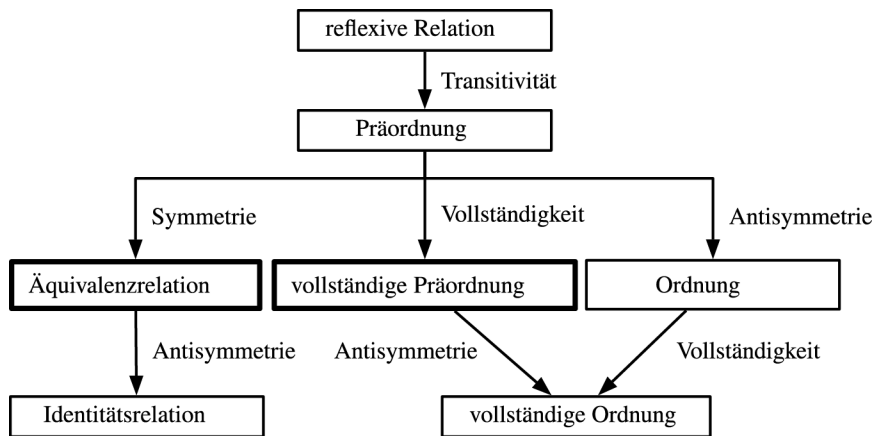

**Figur 4.12:** Hierarchische Anordnung von Relationen

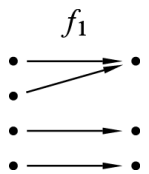

**Figur 5.1:** Abbildung  $f_1$  ist surjektiv, nicht injektiv

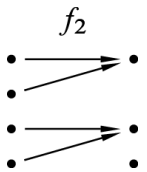

**Figur 5.2:** Abbildung  $f_2$  ist weder surjektiv noch injektiv

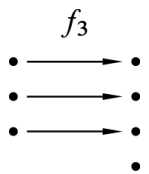

**Figur 5.3:** Abbildung  $f_3$  ist injektiv, nicht surjektiv

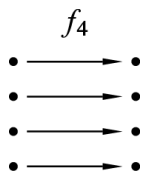

**Figur 5.4:** Abbildung  $f_4$  ist bijektiv



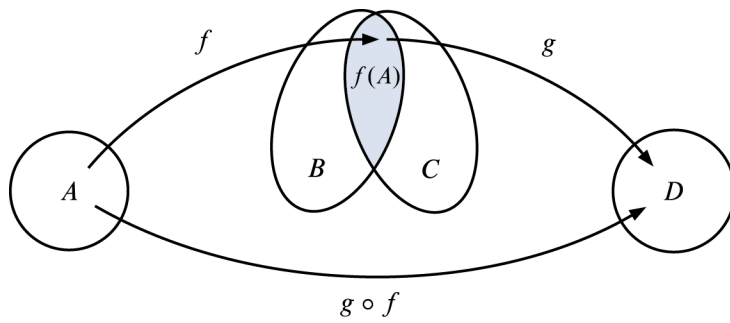

**Figur 5.5:** Komposition von  $f$  und  $g$

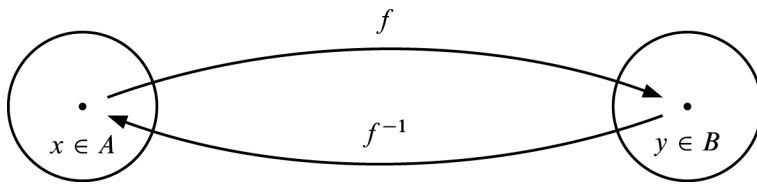

**Figur 5.6:** Umkehrabbildung  $f^{-1}$  von  $f: A \longrightarrow B$

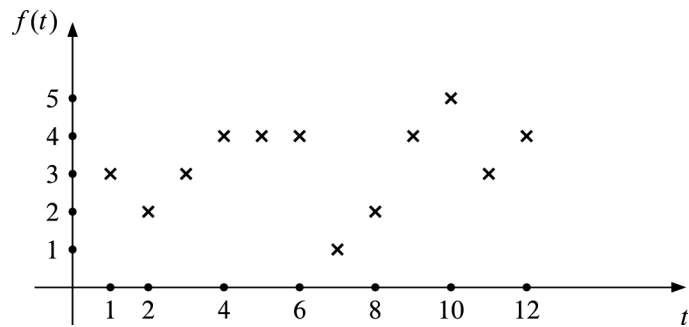

**Figur 5.7:** Graph der Funktion  $f: \{1, \dots, 12\} \rightarrow \{1, 2, 3, 4, 5\}$

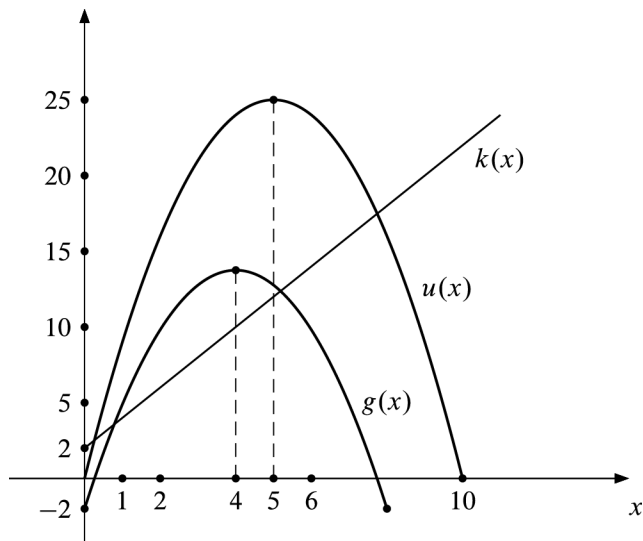

**Figur 5.8:** Graphen der Funktionen  $k$ ,  $u$ ,  $g$  mit  $k(x) = 2 + 2x$ ,  $u(x) = 10x - x^2$ ,  $g(x) = -x^2 + 8x - 2$

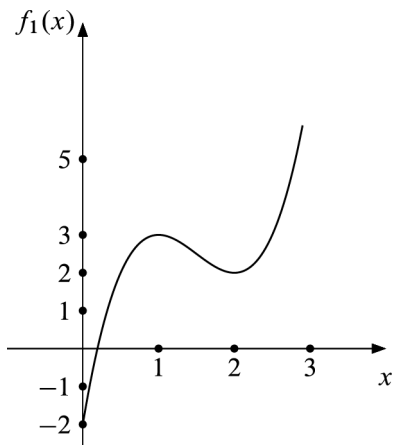

**Figur 5.9:** Graph der Funktion  $f_1$

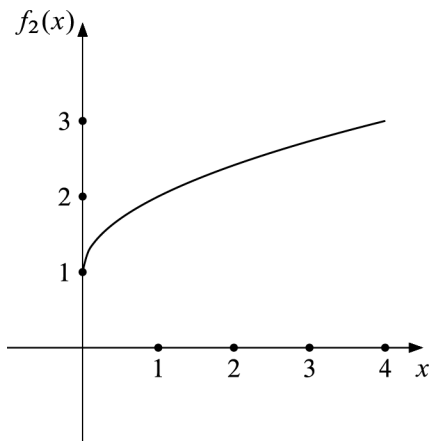

**Figur 5.10:** Graph der Funktion  $f_2$

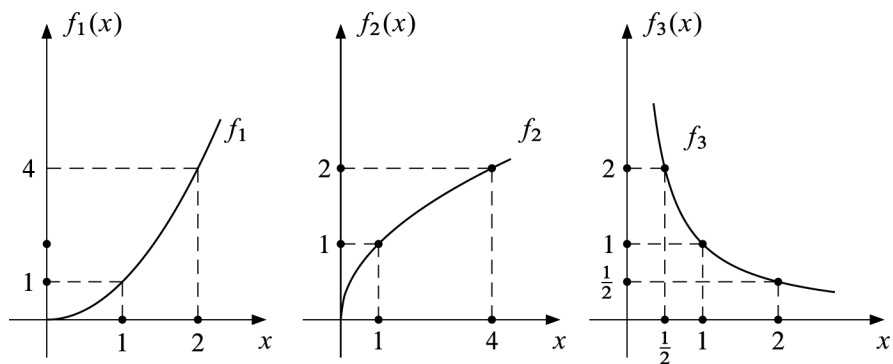

Figur 5.11: Graphen der Funktionen  $f_1$ ,  $f_2$ ,  $f_3$  mit  $f_1(x) = x^2$ ,  $f_2(x) = \sqrt{x}$ ,  $f_3(x) = \frac{1}{x}$

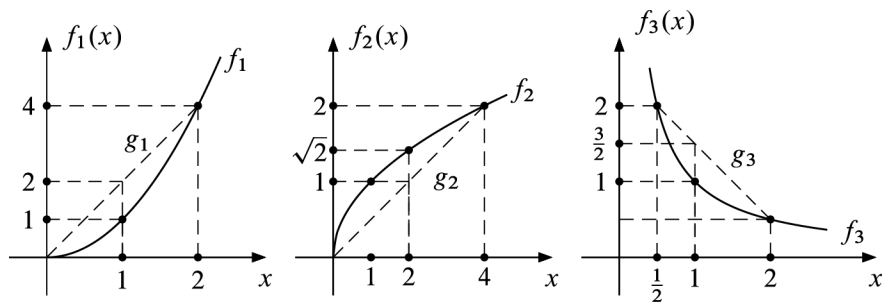

Figur 5.12: Graphen der Funktionen  $f_1$ ,  $f_2$ ,  $f_3$  mit  $f_1(x) = x^2$ ,  $f_2(x) = \sqrt{x}$ ,  $f_3(x) = \frac{1}{x}$



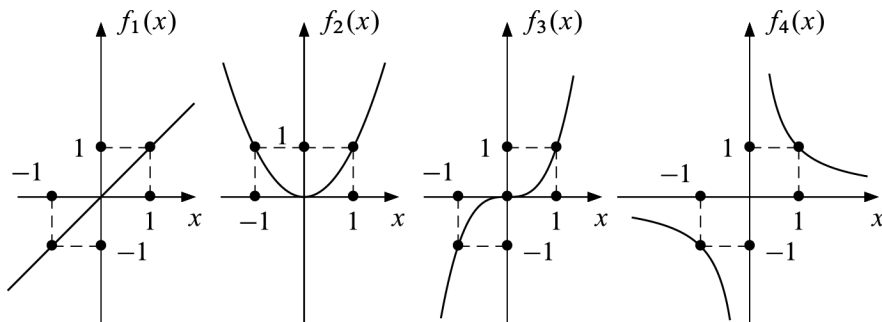

Figur 5.13: Graphen der Funktionen  $f_1$ ,  $f_2$ ,  $f_3$ ,  $f_4$  mit  $f_1(x) = x$ ,  $f_2(x) = x^2$ ,  $f_3(x) = x^3$ ,  $f_4(x) = \frac{1}{x}$

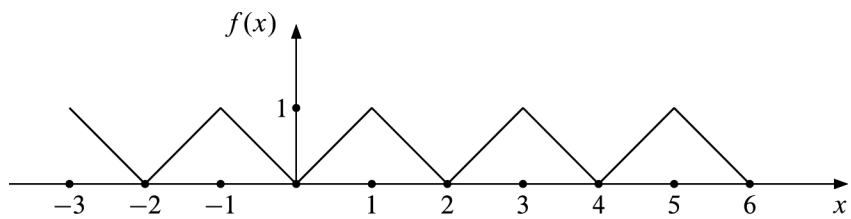

**Figur 5.14:** Graph einer periodischen Funktion mit  $p = 2$

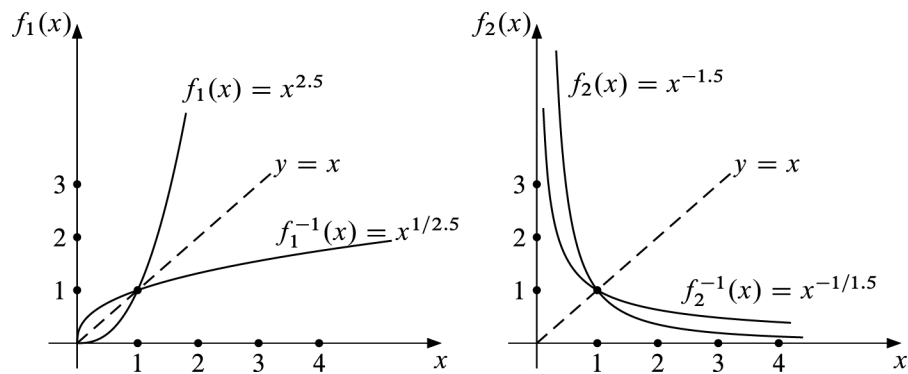

**Figur 6.1:** Graphen der Potenzfunktionen  $f_1$ ,  $f_2$ ,  $f_1^{-1}$ ,  $f_2^{-1}$

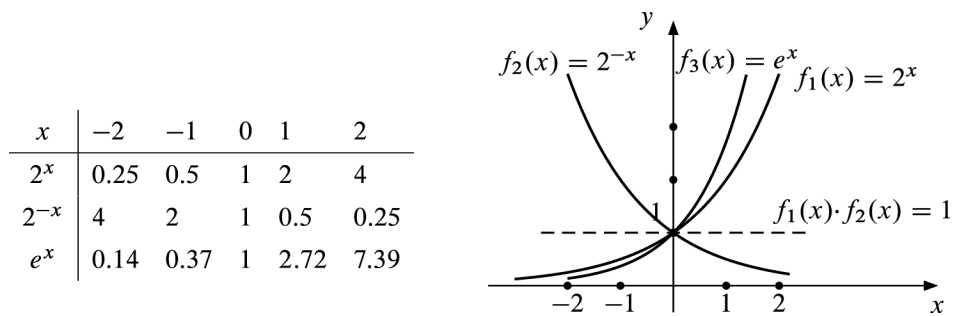

**Figur 6.2:** Graphen der Exponentialfunktionen  $f_1, f_2, f_3$

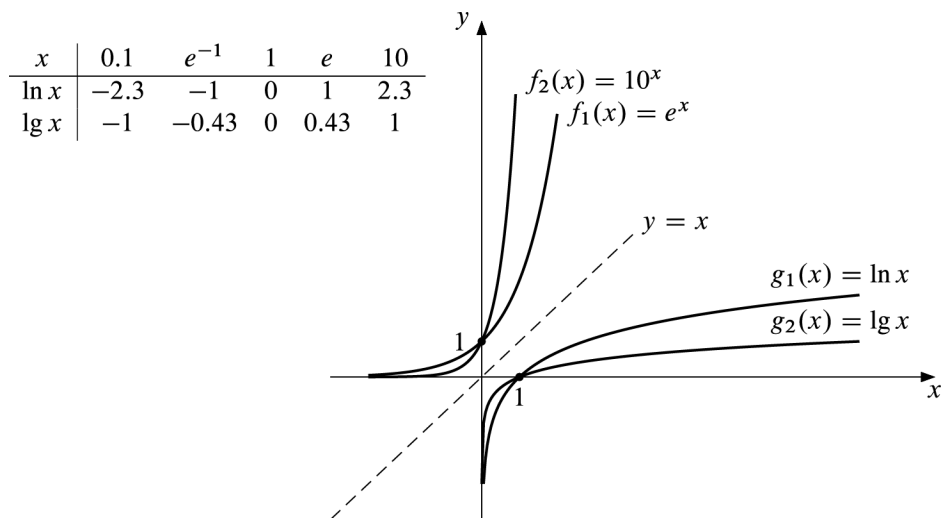

**Figur 6.3:** Graphen der Exponentialfunktionen  $f_1, f_2$  und ihrer Umkehrfunktionen  $g_1, g_2$

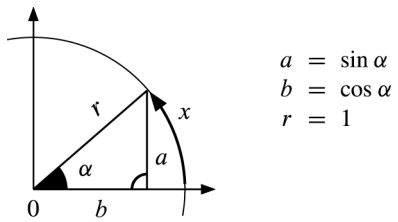

**Figur 6.4:** Sinus- und Kosinuswerte im Einheitskreis

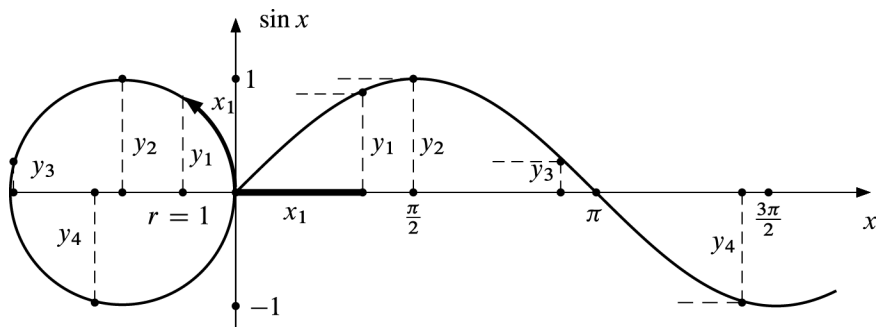

**Figur 6.5:** Graph der Sinusfunktion mit  $y = \sin x$

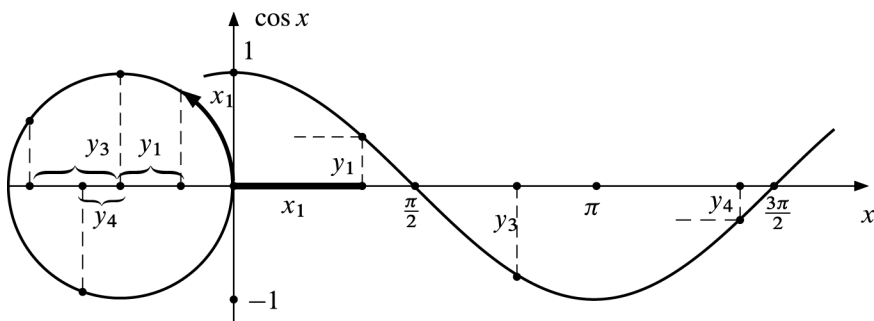

**Figur 6.6:** Graph der Kosinusfunktion mit  $y = \cos x$



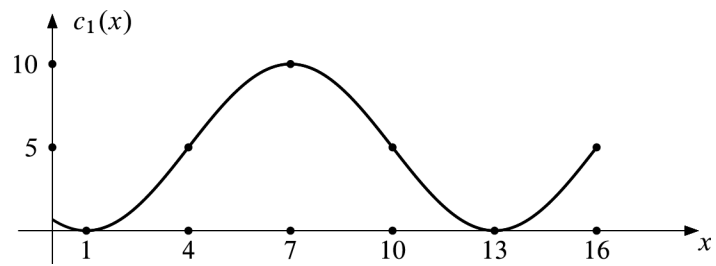

**Figur 6.7:** Graph der Funktion  $c_1$

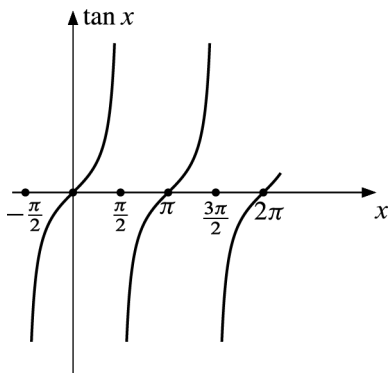

**Figur 6.8:** Graph der Tangensfunktion

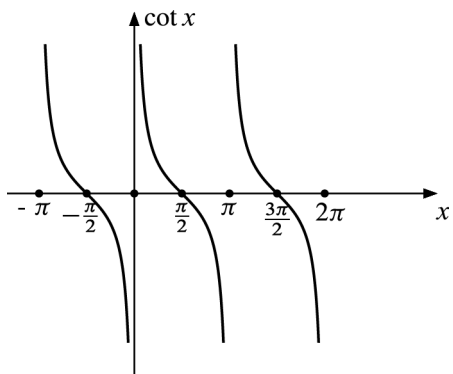

**Figur 6.9:** Graph der Kotangensfunktion

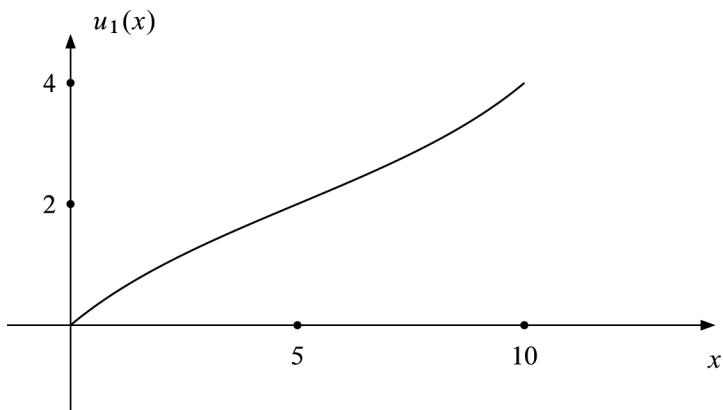

**Figur 6.10:** Graph der Funktion  $u_1$

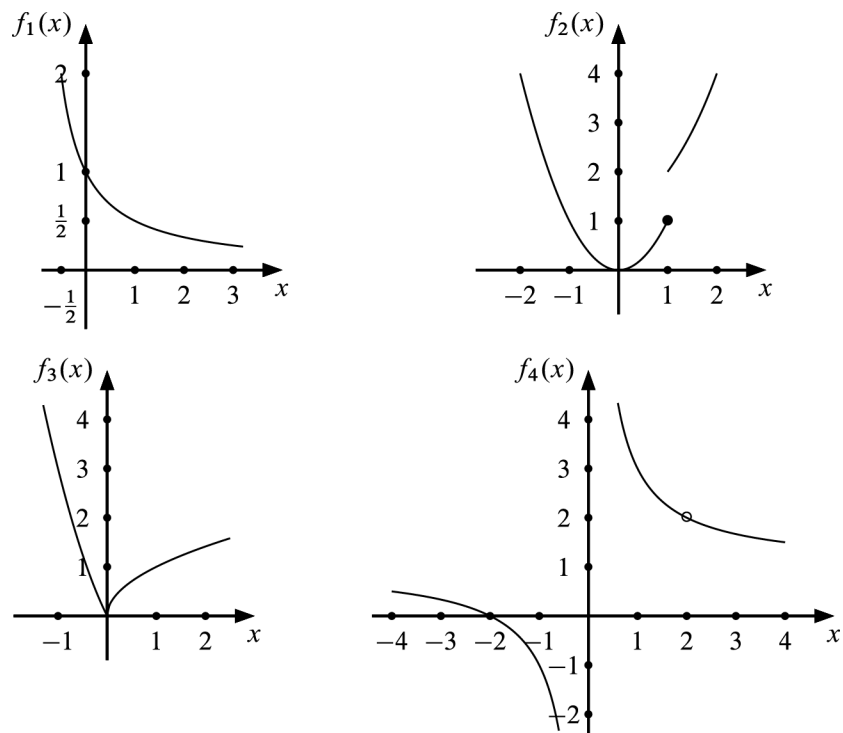

**Figur 7.1:** Graphen der Funktionen  $f_1, f_2, f_3, f_4$

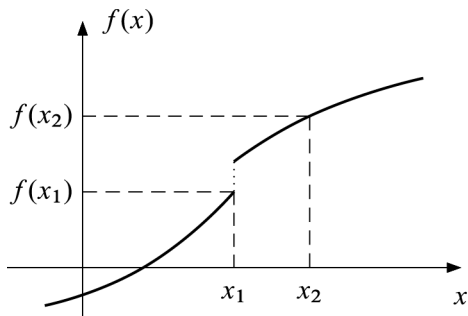

**Figur 7.2:** Stetigkeitsbegriff reeller Funktionen

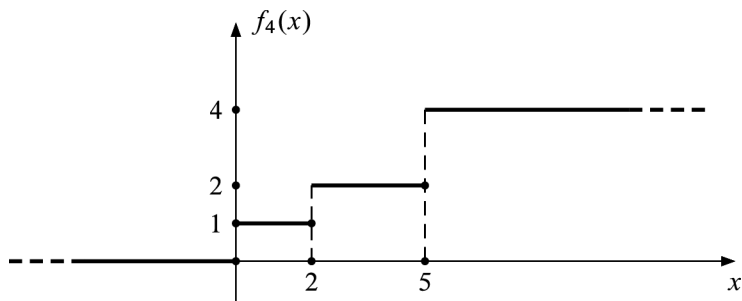

**Figur 7.3:** Graph der Treppenfunktion  $f_4$

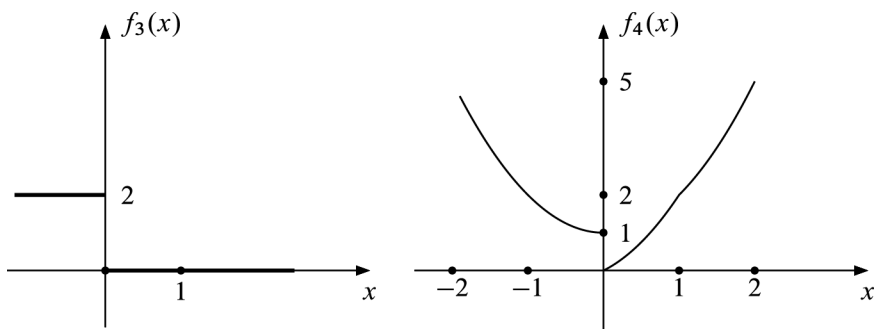

**Figur 7.4:** Graphen der Funktionen  $f_3, f_4$



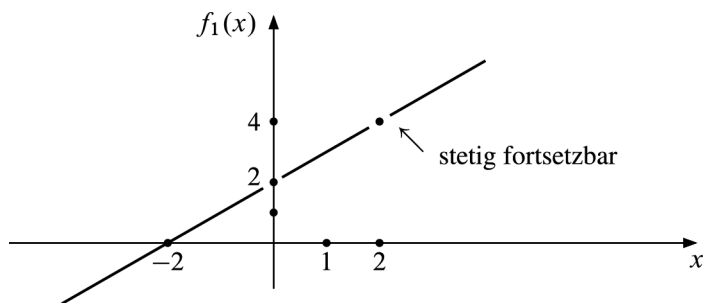

**Figur 7.5:** Graph der Funktion  $f_1$

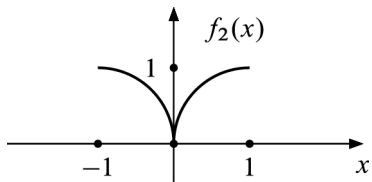

**Figur 7.6:** Graph der Funktion  $f_2$

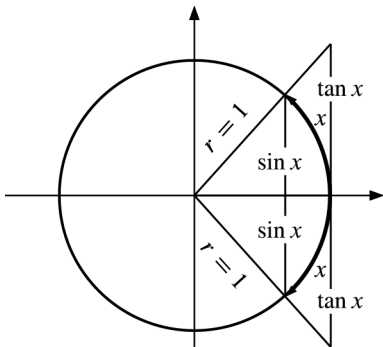

Figur 7.7: Sinus- und Tangensfunktion am Einheitskreis mit  $x \in \left(-\frac{\pi}{2}, \frac{\pi}{2}\right)$

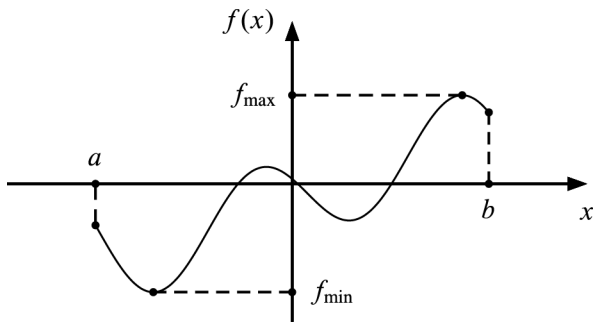

Figur 7.8:  $f: [a, b] \rightarrow \mathbb{R}$  mit  $f$  stetig

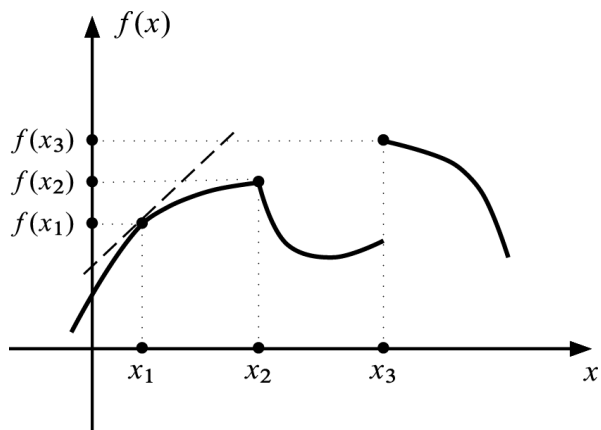

**Figur 8.1:** Differentiation reeller Funktionen

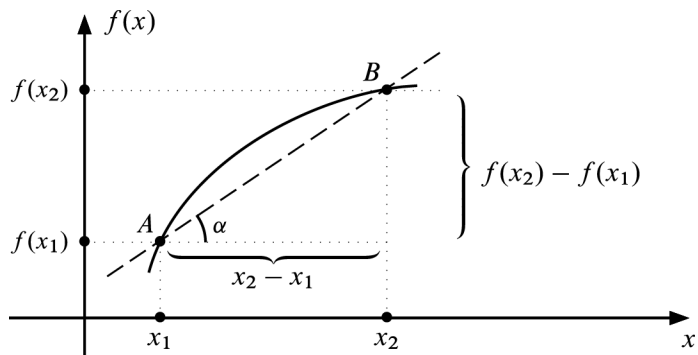

**Figur 8.2:** Differenzenquotient einer reellen Funktion

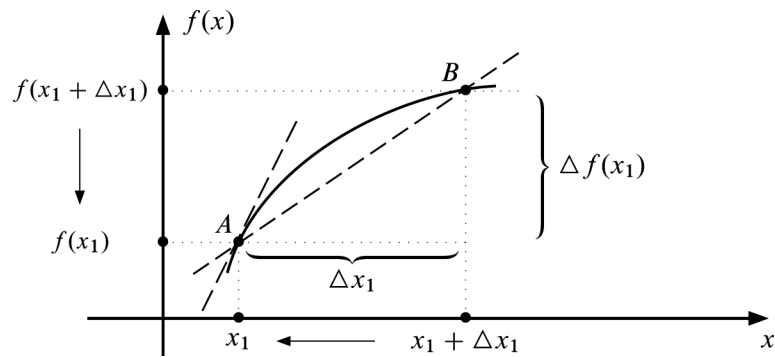

**Figur 8.3:** Differentialquotient einer reellen Funktion

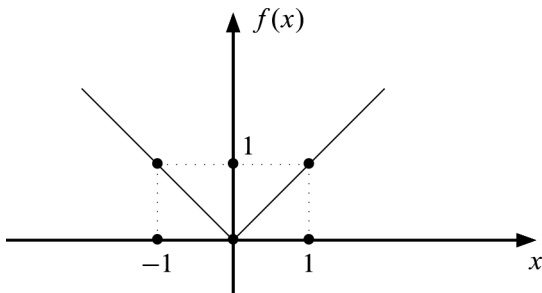

**Figur 8.4:** Graph der Funktion  $f$  mit  $f(x) = |x|$



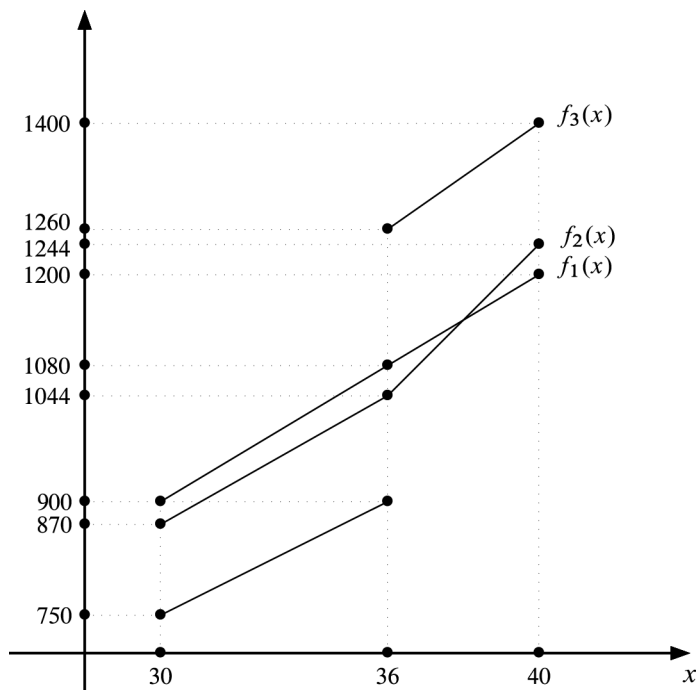

**Figur 8.5:** Graphen der Lohnfunktionen  $f_1, f_2, f_3$

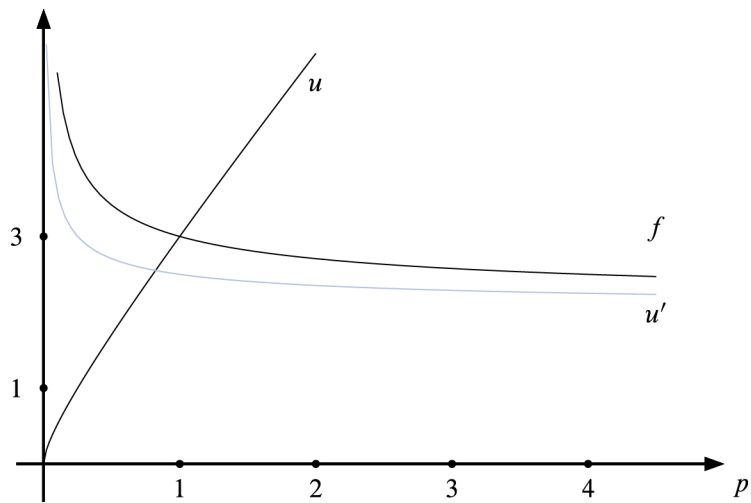

Figur 8.6: Graphen der Funktionen  $f$ ,  $u$  und  $u'$  mit

$$f(p) = 2 + \frac{1}{\sqrt{p}}, \quad u(p) = 2p + \sqrt{p}, \quad u'(p) = 2 + \frac{1}{2\sqrt{p}}$$

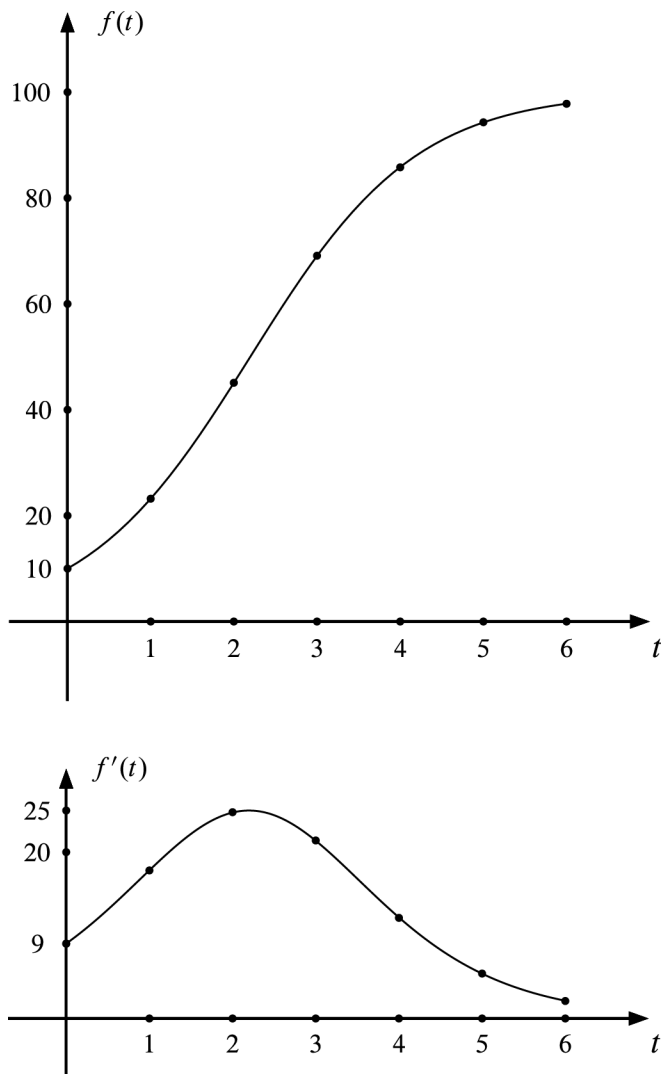

**Figur 8.7:** Graphen der logistischen Funktion  $f$  und ihrer Ableitung  $f'$

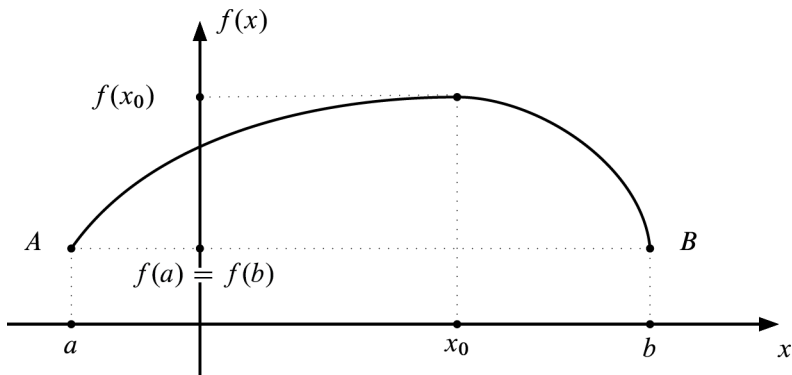

**Figur 9.1:** Satz von Rolle

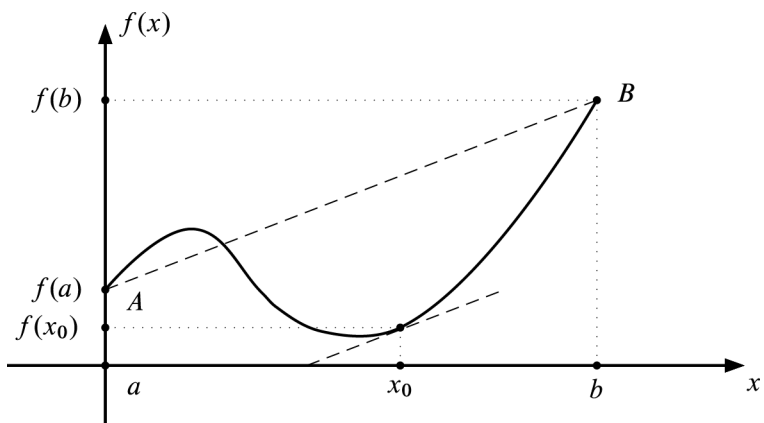

**Figur 9.2:** Mittelwertsatz der Differentialrechnung

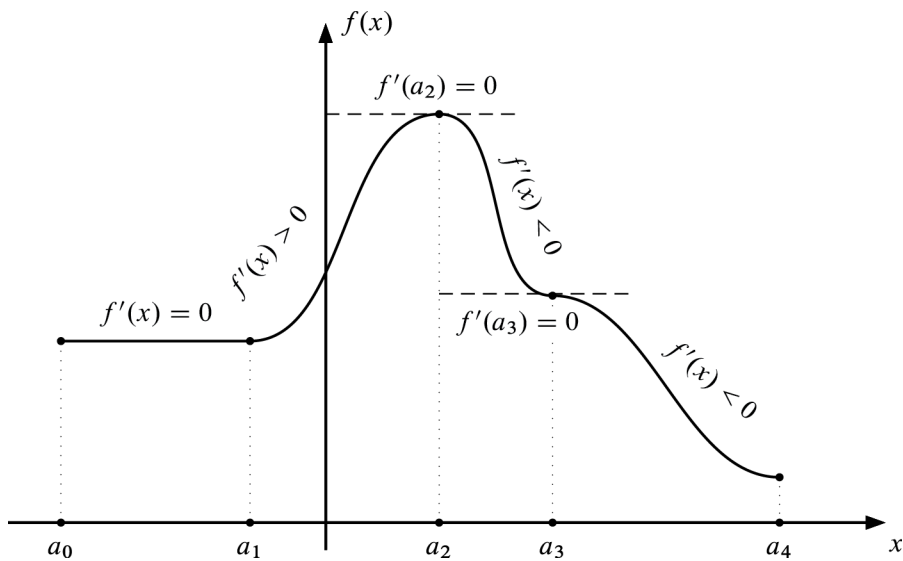

**Figur 9.3:** Monotonie einer differenzierbaren Funktion

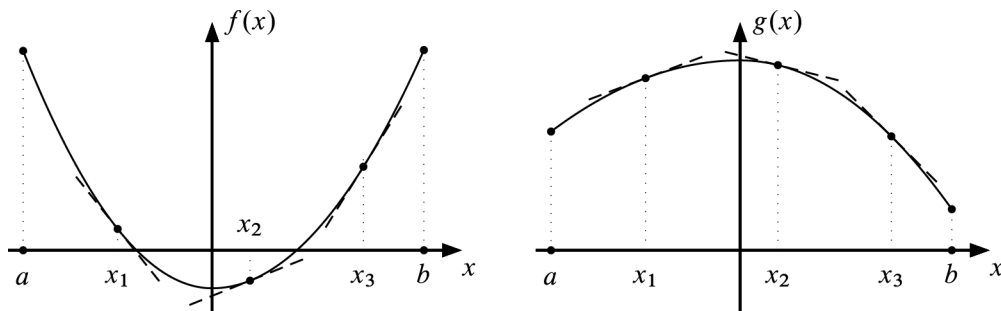

**Figur 9.4:**  $f$  als konvexe Funktion,  $g$  als konkave Funktion

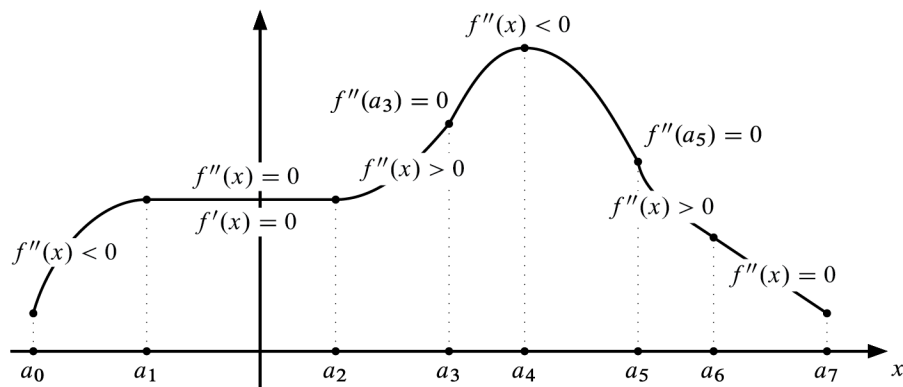

**Figur 9.5:** Konvexität und Konkavität einer differenzierbaren Funktion



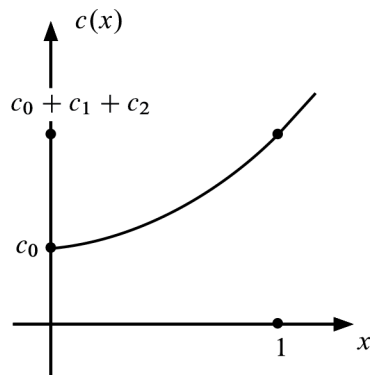

**Figur 9.6:** Quadratische Kostenfunktion

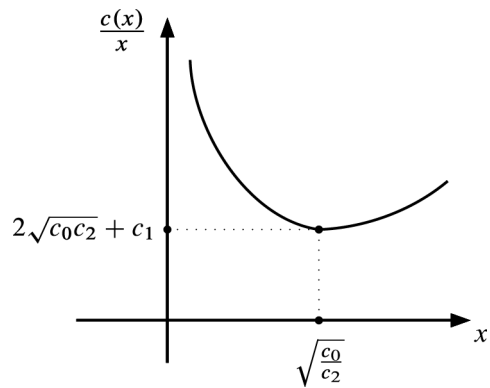

**Figur 9.7:** Stückkostenfunktion einer quadratischen Kostenfunktion

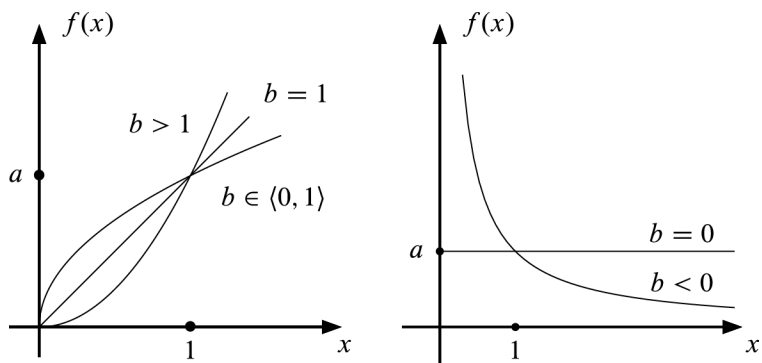

**Figur 9.8:** Potenzfunktion mit  $f(x) = ax^b$

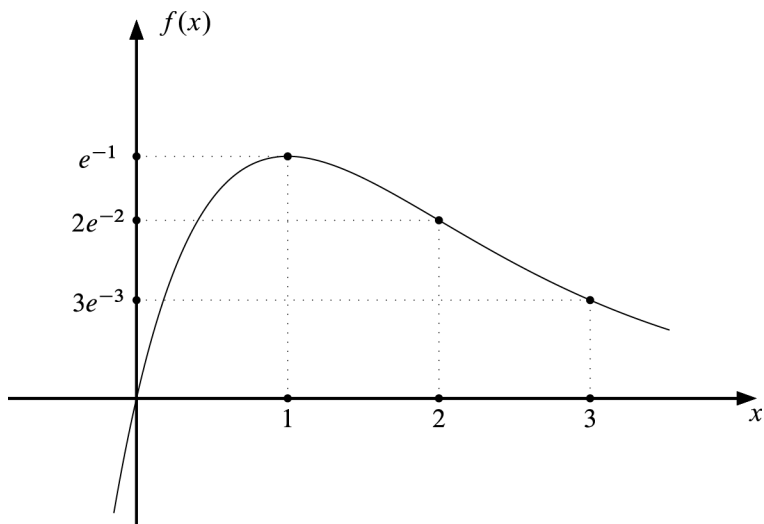

**Figur 9.9:** Graph der Funktion  $f$  mit  $f(x) = xe^{-x}$

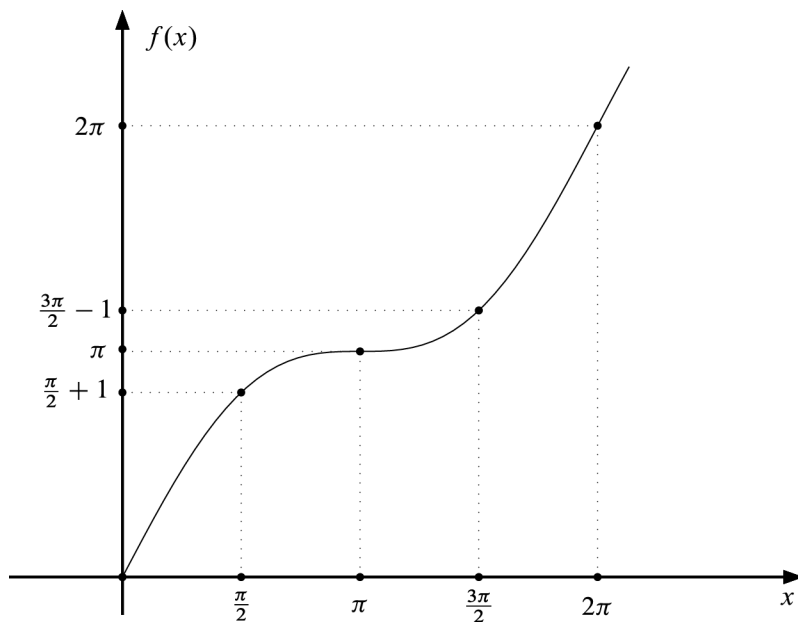

**Figur 9.10:** Graph der Funktion  $f$  mit  $f(x) = x + \sin x$

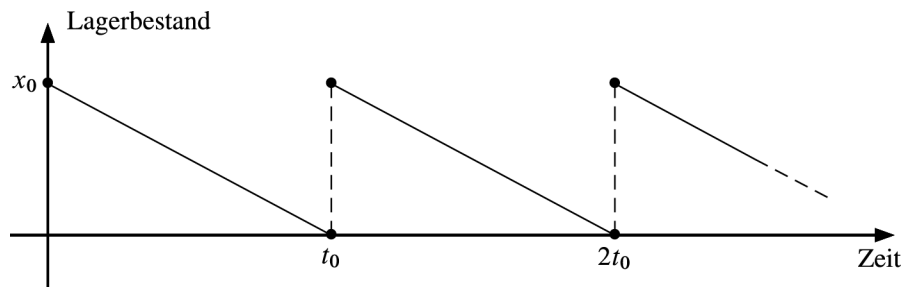

**Figur 9.11:** Lagerbestand bei konstanter Nachfrage pro Zeiteinheit und Bestellung in gleichen Zeitabständen  $t_0, 2t_0, \dots$

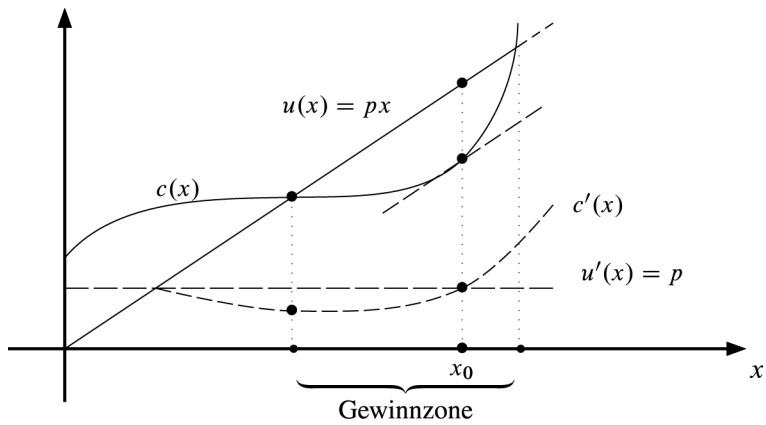

**Figur 9.12:** Gewinnmaximierung bei vollständiger Konkurrenz

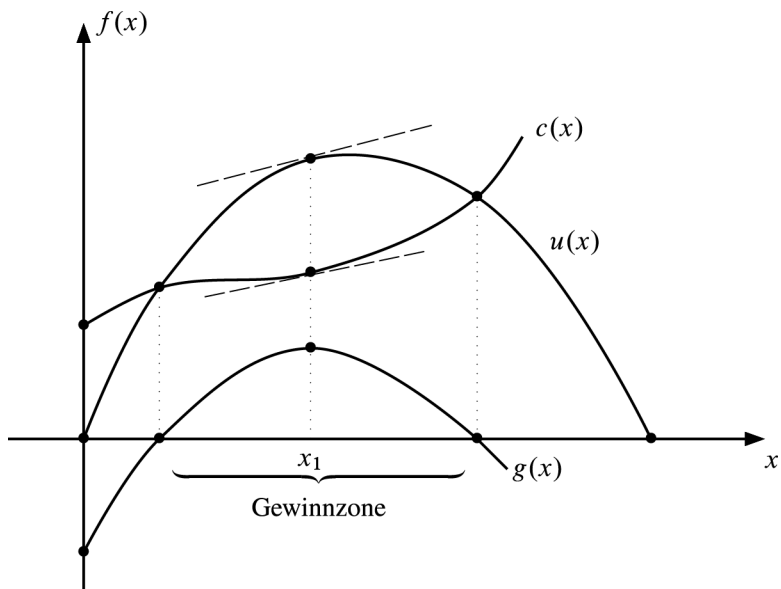

**Figur 9.13:** Gewinnmaximierung beim Angebotsmonopol



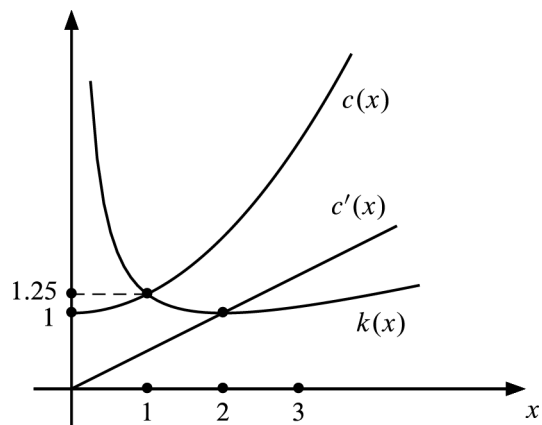

**Figur 9.14:** Zusammenhang von Kosten, Stückkosten und Grenzkosten

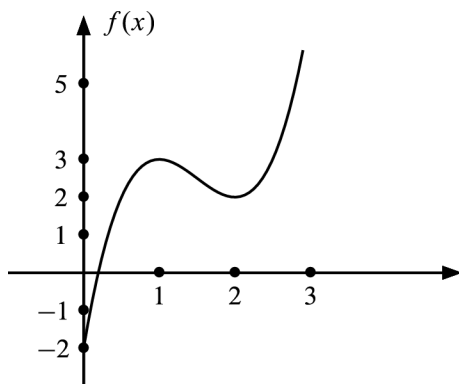

**Figur 9.15:** Graph der Funktion  $f$

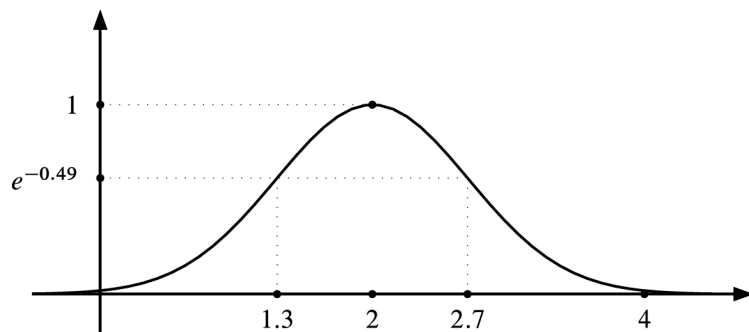

**Figur 9.16:** Graph der Funktion mit  $f(x) = e^{-(x-2)^2}$

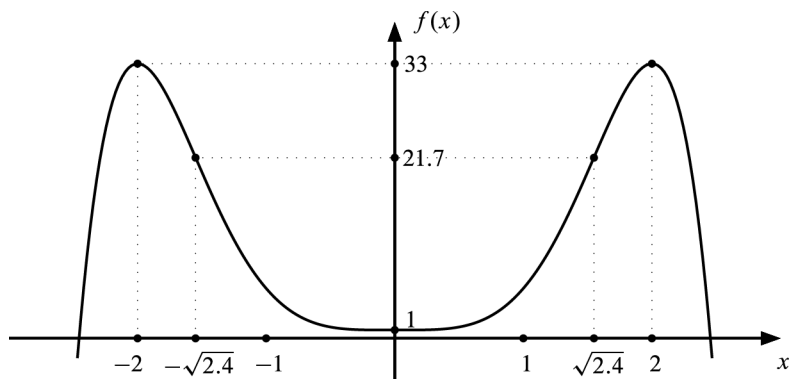

**Figur 9.17:** Graph der Funktion  $f$  mit  $f(x) = -x^6 + 6x^4 + 1$

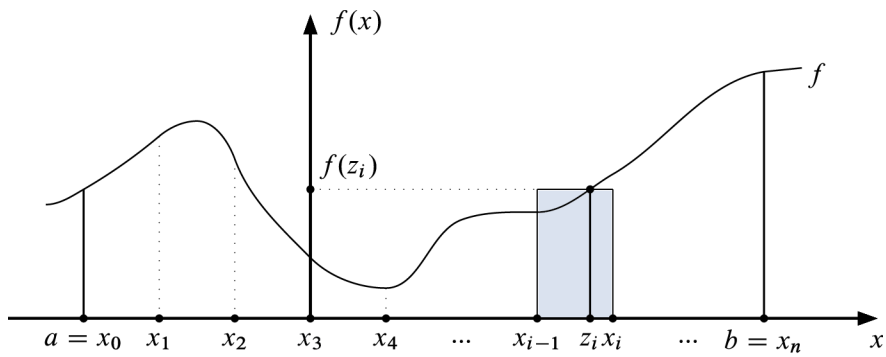

**Figur 10.1:** Flächeninhalt und Riemannsche Summe

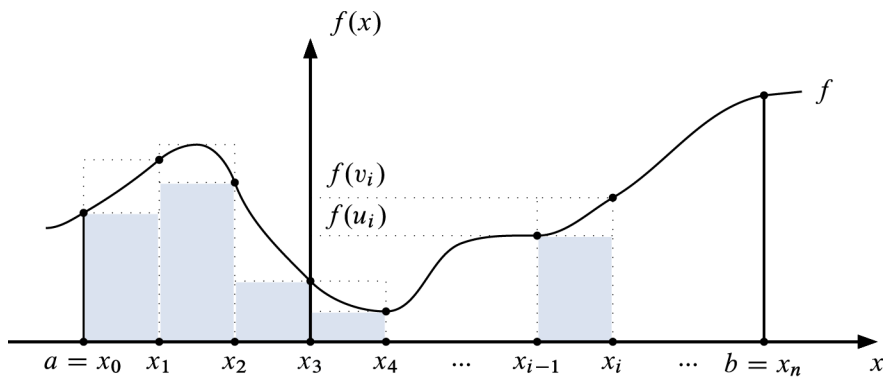

**Figur 10.2:** Unter- und Oberschranken des Flächeninhalts

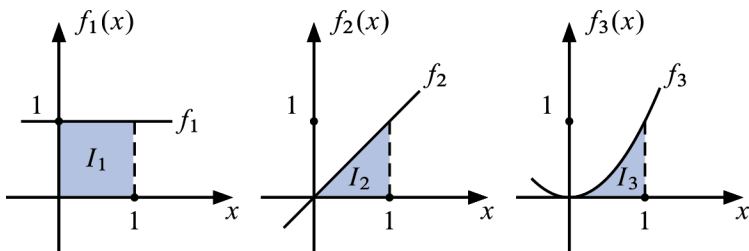

**Figur 10.3:** Bestimmte Integrale der Funktionen  $f_1, f_2, f_3$  in  $[0,1]$

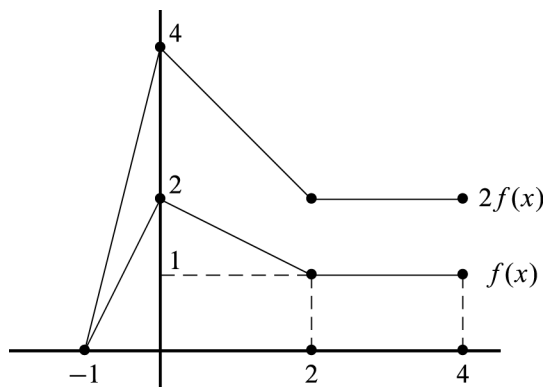

**Figur 10.4:** Kurvenverläufe  $f(x)$ ,  $g(x) = 2f(x)$  mit  $x \in [a, b]$



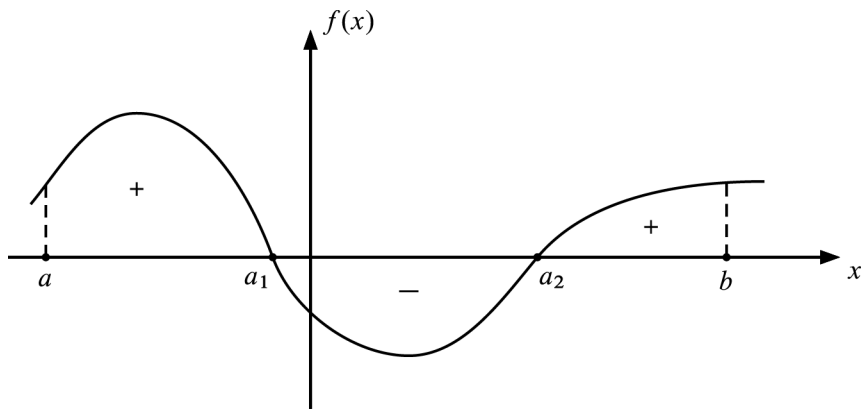

Figur 10.5: Funktion  $f$  mit  $\int_{a_1}^{a_2} f(x) dx < 0$

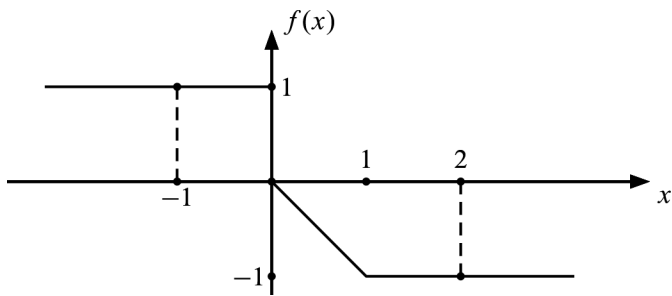

**Figur 10.6:** Graph der Funktion  $f$

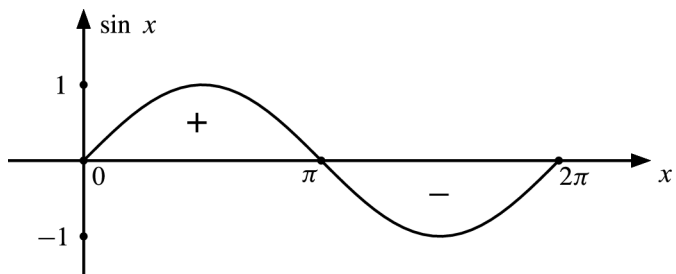

**Figur 10.7:** Sinusfunktion

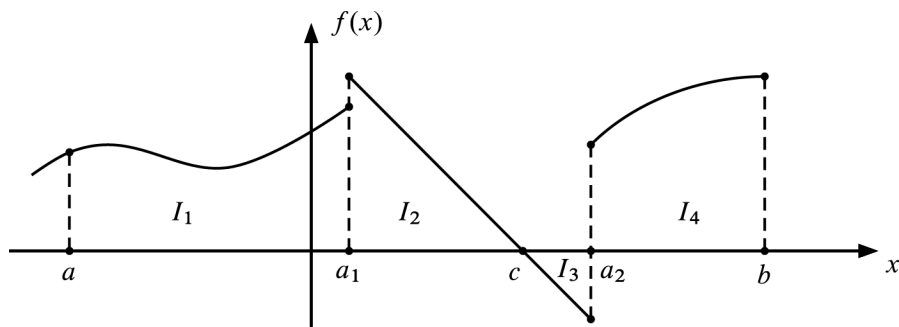

**Figur 10.8:** Funktion mit Sprungstellen  $a_1, a_2$

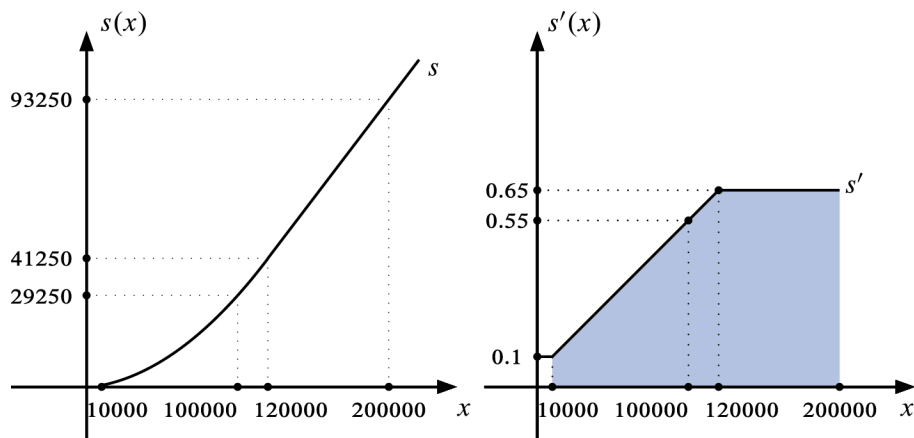

**Figur 10.9:** Steuersatz- und Grenzsteuersatzfunktion zu Beispiel 10.22 b

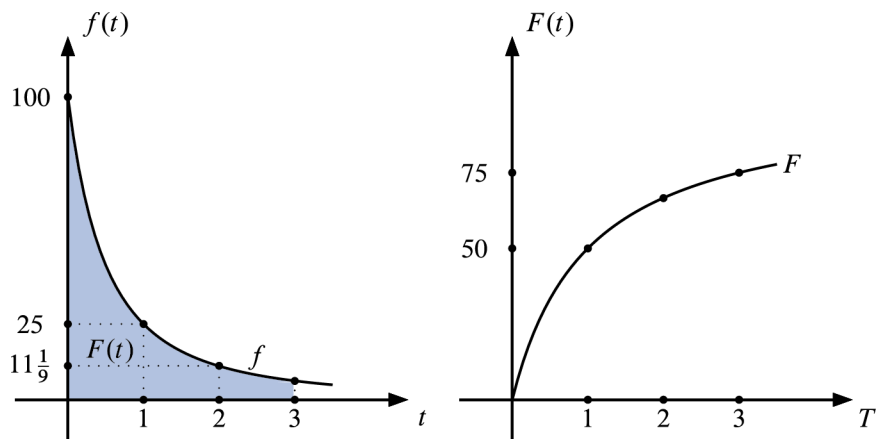

**Figur 10.10:** Graph von  $f$  mit  $f(t) = 100(1 + t)^{-2}$  und zugehörige Stammfunktion

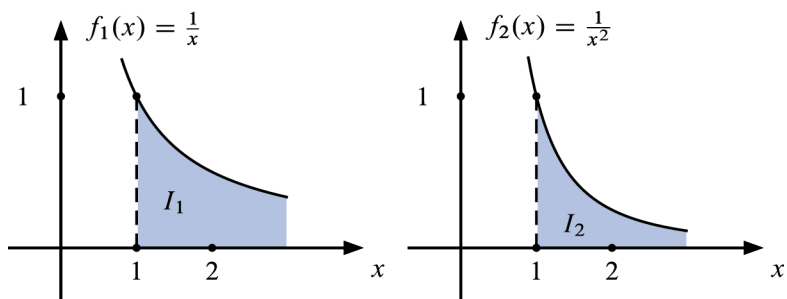

**Figur 10.11:** Uneigentliche Integrale im Intervall  $[1, \infty]$

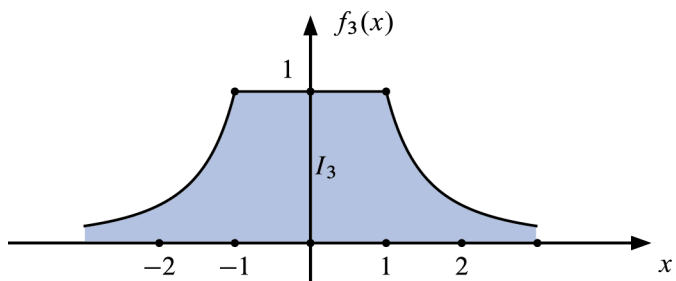

**Figur 10.12:** Uneigentliches Integral im Intervall  $<-\infty, \infty>$



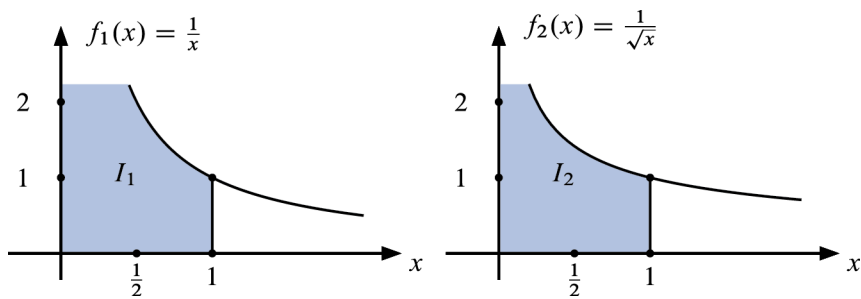

**Figur 10.13:** Uneigentliche Integrale im Intervall  $[0, 1]$

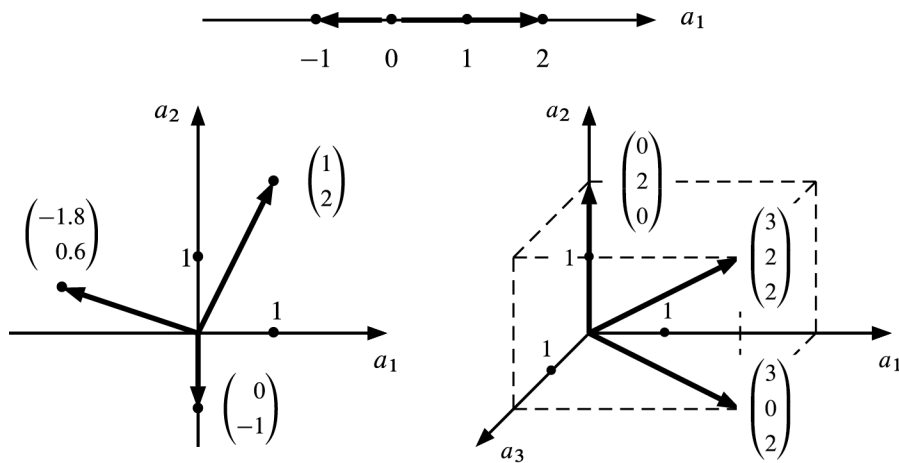

Figur 11.1: Vektoren im  $\mathbb{R}^1, \mathbb{R}^2$  und  $\mathbb{R}^3$

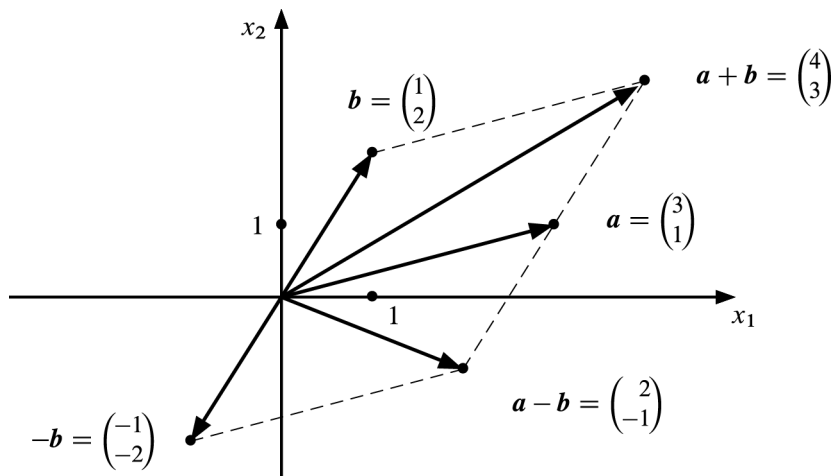

Figur 11.2: Addition und Subtraktion von Vektoren des  $\mathbb{R}^2$

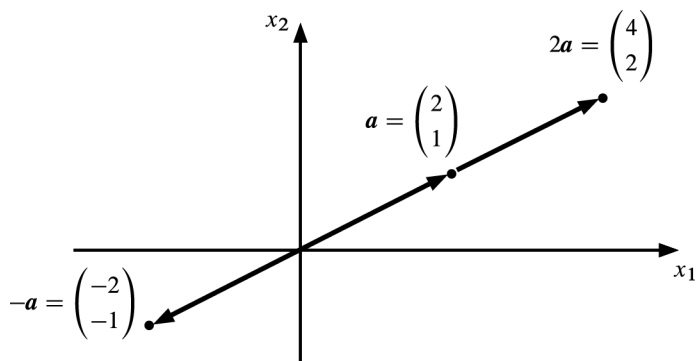

Figur 11.3: Skalare Multiplikation von Vektoren des  $\mathbb{R}^2$

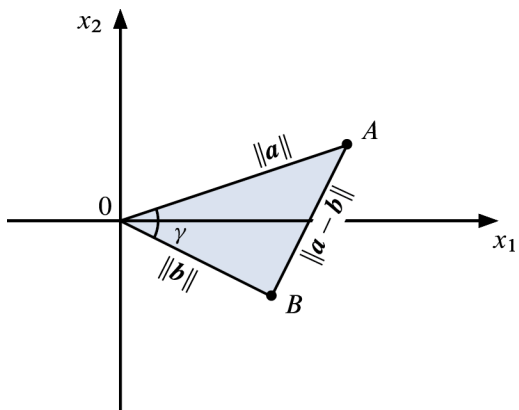

**Figur 12.1:** Kosinussatz im Dreieck  $OAB$

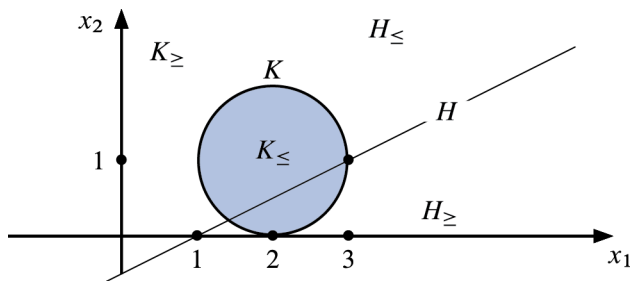

Figur 12.2: Geometrische Darstellung der Punktmengen  
 $H, H_{\leq}, H_{\geq}, K, K_{\leq}, K_{\geq}$  im  $\mathbb{R}^2$

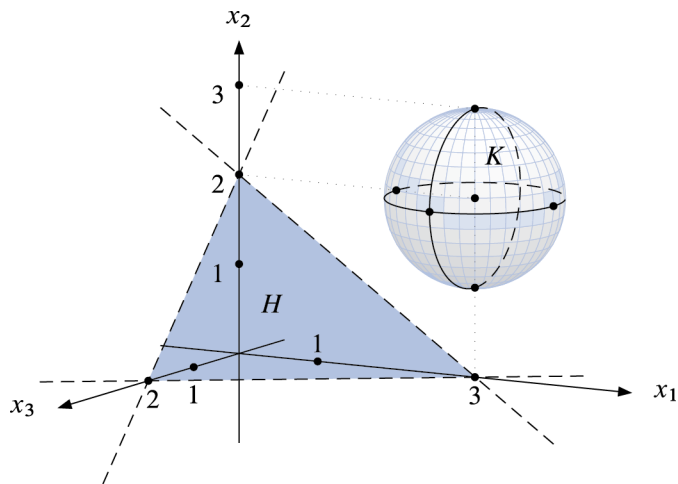

Figur 12.3: Geometrische Darstellung der Punktmengen  $H$  und  $K$  im  $\mathbb{R}^3$

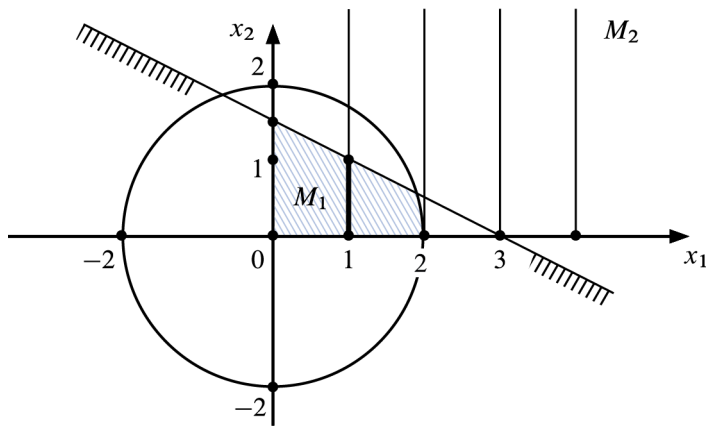

Figur 12.4: Geometrische Darstellung der Punktmengen  $M_1, M_2 \subset \mathbb{R}^2$



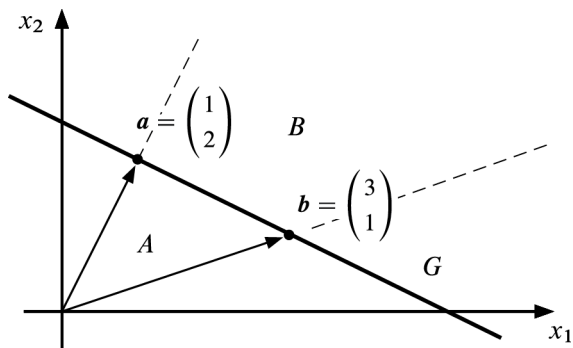

Figur 12.5: Linearkombinationen  $r_1a + r_2b$  im  $\mathbb{R}^2$

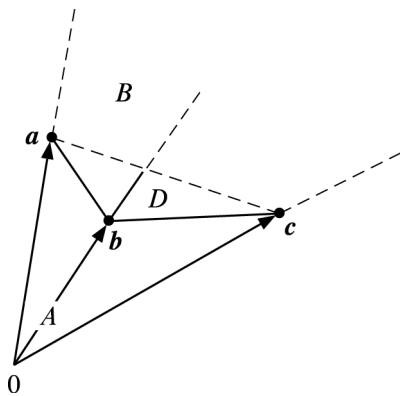

Figur 12.6: Linearkombinationen  $r_1\mathbf{a} + r_2\mathbf{b} + r_3\mathbf{c}$  im  $\mathbb{R}^3$

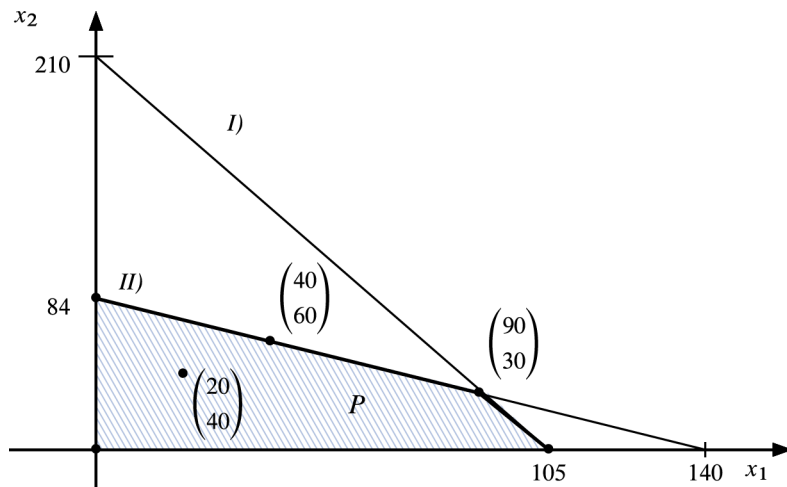

**Figur 12.7:** Graphische Darstellung von  $P$

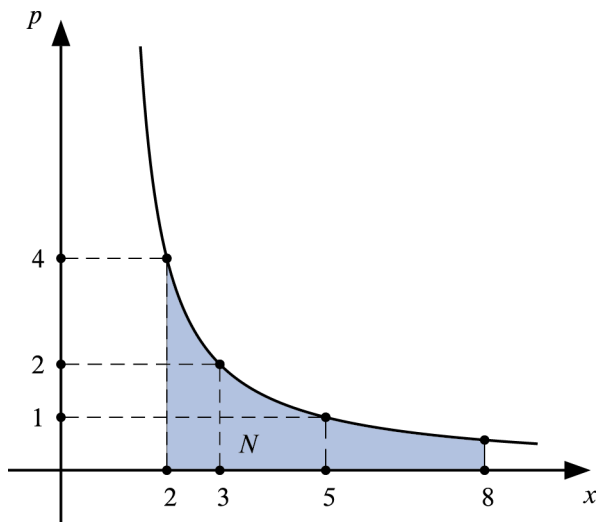

**Figur 12.8:** Graphische Darstellung von  $N$

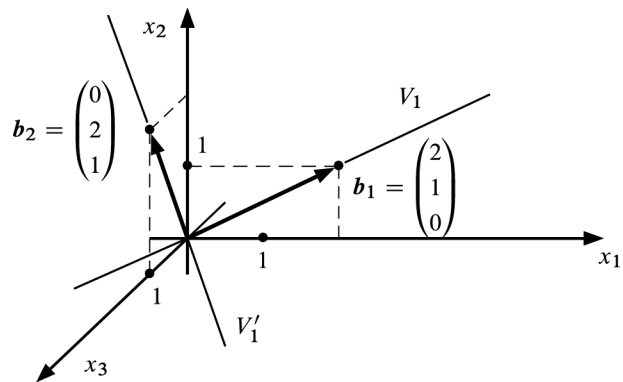

**Figur 13.1:** Vektorräume  $V_1$ ,  $V'_1$  der Dimension 1

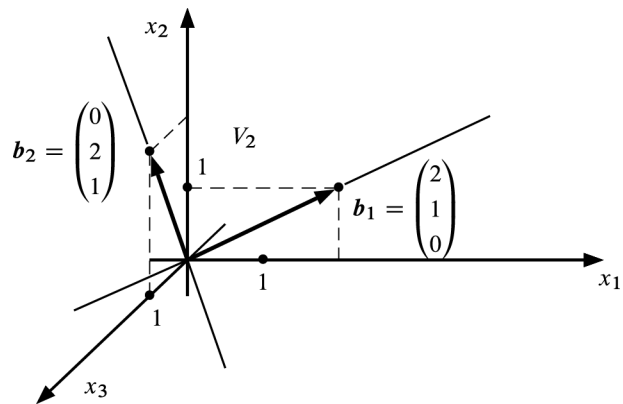

**Figur 13.2:** Vektorraum  $V_2$  der Dimension 2

| Zeile    | Basis    | $c_k$    | $a$                               | Operation                                   |
|----------|----------|----------|-----------------------------------|---------------------------------------------|
| ①        | $b_1$    | $r_1$    | $p_1$                             |                                             |
| ②        | $b_2$    | $r_2$    | $p_2$                             |                                             |
| $\vdots$ | $\vdots$ | $\vdots$ | $\vdots$                          |                                             |
| Ⓚ        | $b_k$    | $r_k$    | $p_k$                             |                                             |
| $\vdots$ | $\vdots$ | $\vdots$ | $\vdots$                          |                                             |
| Ⓝ        | $b_n$    | $r_n$    | $p_n$                             |                                             |
| Ⓝ+1      | $b_1$    | 0        | $q_1 = p_1 - \frac{r_1 p_k}{r_k}$ | ① $- \frac{r_1}{r_k} \cdot \textcircled{k}$ |
| Ⓝ+2      | $b_2$    | 0        | $q_2 = p_2 - \frac{r_2 p_k}{r_k}$ | ② $- \frac{r_2}{r_k} \cdot \textcircled{k}$ |
| $\vdots$ | $\vdots$ | $\vdots$ | $\vdots$                          | $\vdots$                                    |
| Ⓝ+Ⓚ      | $c_k$    | 1        | $q_k = \frac{p_k}{r_k}$           | Ⓚ $\cdot \frac{1}{r_k}$                     |
| $\vdots$ | $\vdots$ | $\vdots$ | $\vdots$                          | $\vdots$                                    |
| 2Ⓝ       | $b_n$    | 0        | $q_n = p_n - \frac{r_n p_k}{r_k}$ | Ⓝ $- \frac{r_n}{r_k} \cdot \textcircled{k}$ |

**Figur 13.3:** Austausch eines Basisvektors

| Zeile    | $a^1$    | $a^2$                                   | $a^n$                                         | Operation                                         |
|----------|----------|-----------------------------------------|-----------------------------------------------|---------------------------------------------------|
| ①        | $a_{11}$ | $a_{12}$                                | $\dots a_{1n}$                                |                                                   |
| ②        | $a_{21}$ | $a_{22}$                                | $\dots a_{2n}$                                |                                                   |
| $\vdots$ | $\vdots$ | $\vdots$                                | $\vdots$                                      |                                                   |
| Ⓜ        | $a_{m1}$ | $a_{m2}$                                | $\dots a_{mn}$                                |                                                   |
| Ⓜ+1      | 1        | $\frac{a_{12}}{a_{11}}$                 | $\dots \frac{a_{1n}}{a_{11}}$                 | ① / $a_{11}$                                      |
| Ⓜ+2      | 0        | $a_{22} - \frac{a_{21}}{a_{11}} a_{12}$ | $\dots a_{2n} - \frac{a_{21}}{a_{11}} a_{1n}$ | ② - $\frac{a_{21}}{a_{11}} \cdot \textcircled{1}$ |
| $\vdots$ | $\vdots$ | $\vdots$                                | $\vdots$                                      |                                                   |
| 2Ⓜ       | 0        | $a_{m2} - \frac{a_{m1}}{a_{11}} a_{12}$ | $\dots a_{mn} - \frac{a_{m1}}{a_{11}} a_{1n}$ | Ⓜ - $\frac{a_{m1}}{a_{11}} \cdot \textcircled{1}$ |

**Figur 13.4:** Erster Schritt des Gaußalgorithmus



| Zeile                | $b^1$    | $b^2$            | $b^3$                                   | $b^n$                                         | Operation                                                           |
|----------------------|----------|------------------|-----------------------------------------|-----------------------------------------------|---------------------------------------------------------------------|
| $\textcircled{m+1}$  | 1        | $b_{12}$         | $b_{13}$                                | $\dots b_{1n}$                                |                                                                     |
| $\textcircled{m+2}$  | 0        | $\boxed{b_{22}}$ | $b_{23}$                                | $\dots b_{2n}$                                |                                                                     |
| $\vdots$             | $\vdots$ | $\vdots$         | $\vdots$                                | $\vdots$                                      |                                                                     |
| $\textcircled{2m}$   | 0        | $b_{m2}$         | $b_{m3}$                                | $\dots b_{mn}$                                |                                                                     |
| $\textcircled{2m+1}$ | 1        | 0                | $b_{13} - \frac{b_{12}}{b_{22}} b_{23}$ | $\dots b_{1n} - \frac{b_{12}}{b_{22}} b_{2n}$ | $\textcircled{m+1} - \frac{b_{12}}{b_{22}} \cdot \textcircled{m+2}$ |
| $\textcircled{2m+2}$ | 0        | 1                | $\frac{b_{23}}{b_{22}}$                 | $\dots \frac{b_{2n}}{b_{22}}$                 | $\textcircled{m+2} / b_{22}$                                        |
| $\textcircled{2m+3}$ | 0        | 0                | $b_{33} - \frac{b_{32}}{b_{22}} b_{23}$ | $\dots b_{3n} - \frac{b_{32}}{b_{22}} b_{2n}$ | $\textcircled{m+3} - \frac{b_{32}}{b_{22}} \cdot \textcircled{m+2}$ |
| $\vdots$             | $\vdots$ | $\vdots$         | $\vdots$                                | $\vdots$                                      |                                                                     |
| $\textcircled{3m}$   | 0        | 0                | $b_{m3} - \frac{b_{m2}}{b_{22}} b_{23}$ | $\dots b_{mn} - \frac{b_{m2}}{b_{22}} b_{2n}$ | $\textcircled{2m} - \frac{b_{m2}}{b_{22}} \cdot \textcircled{m+2}$  |

**Figur 13.5:** Zweiter Schritt des Gaußalgorithmus

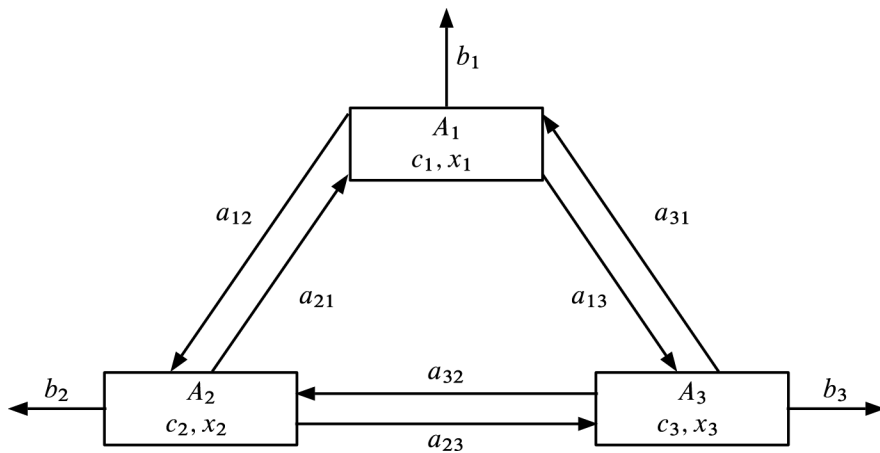

**Figur 14.1:** Innerbetriebliche Leistungsverflechtung der Abteilungen  $A_1$ ,  $A_2$ ,  $A_3$

| Abteilung | Sekundärkosten für<br>abgegebene Leistungen | Primärkosten +<br>Sekundärkosten für<br>empfangene Leistungen |
|-----------|---------------------------------------------|---------------------------------------------------------------|
| $A_1$     | $x_1(b_1 + a_{12} + a_{13})$                | $c_1 + x_2a_{21} + x_3a_{31}$                                 |
| $A_2$     | $x_2(b_2 + a_{21} + a_{23})$                | $c_2 + x_1a_{12} + x_3a_{32}$                                 |
| $A_3$     | $x_3(b_3 + a_{31} + a_{32})$                | $c_3 + x_1a_{13} + x_2a_{23}$                                 |

**Figur 14.2:** Zur Verrechnung innerbetrieblicher Leistungen

| Lieferung |       | an                 |                    |                    | Vorrat |
|-----------|-------|--------------------|--------------------|--------------------|--------|
|           |       | $V_1$              | $V_2$              | $V_3$              |        |
| von       | $W_1$ | $(x_{11}, c_{11})$ | $(x_{12}, c_{12})$ | $(x_{13}, c_{13})$ | $a_1$  |
|           | $W_2$ | $(x_{21}, c_{21})$ | $(x_{22}, c_{22})$ | $(x_{23}, c_{23})$ | $a_2$  |
| Bedarf    |       | $b_1$              | $b_2$              | $b_3$              |        |

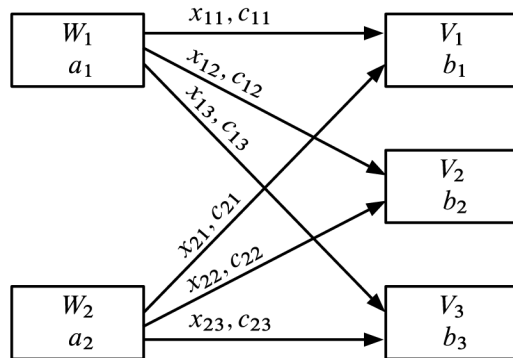

**Figur 14.3:** Lieferungen von den Warenlagern  $W_1, W_2$  an die Verkaufsstellen  $V_1, V_2, V_3$

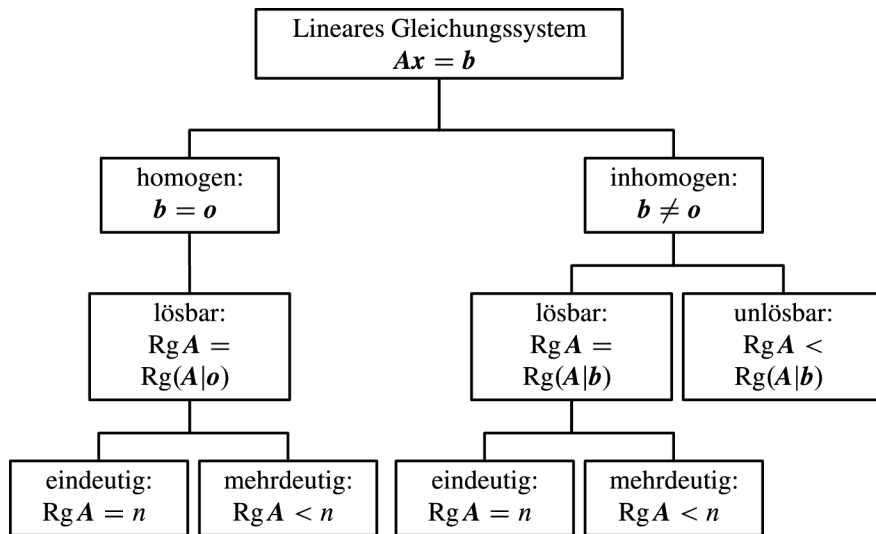

**Figur 14.4:** Zur Lösbarkeit linearer Gleichungssysteme

| Verbrauch        |       | für eine Einheit des Produkts |          |
|------------------|-------|-------------------------------|----------|
|                  |       | $P_1$                         | $P_2$    |
| von Einheiten    | $F_1$ | $a_{11}$                      | $a_{12}$ |
| der Produktions- | $F_2$ | $a_{21}$                      | $a_{22}$ |
| faktoren         | $F_3$ | $a_{31}$                      | $a_{32}$ |

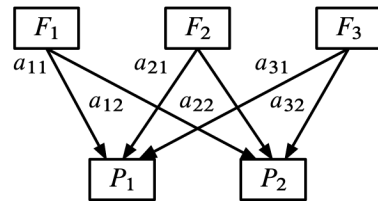

**Figur 15.1:** Herstellung von Produkten  $P_1$ ,  $P_2$  mit Hilfe der Produktionsfaktoren  $F_1$ ,  $F_2$ ,  $F_3$

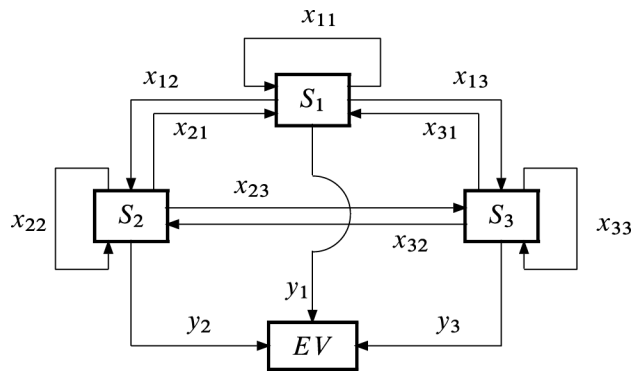

**Figur 15.2:** Lieferströme zwischen produzierenden Sektoren  $S_1$ ,  $S_2$ ,  $S_3$  und Endverbrauch  $EV$

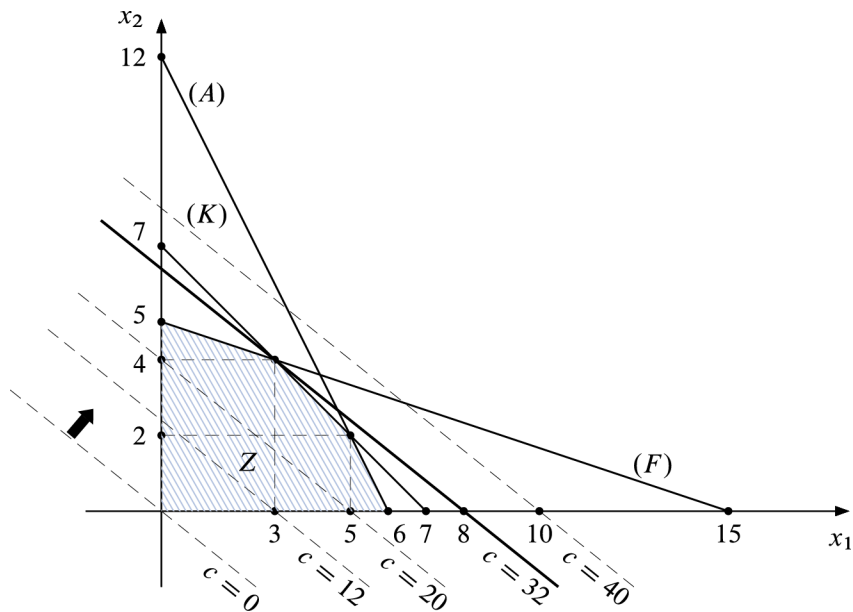

**Figur 16.1:** Graphische Darstellung des Zulässigkeitsbereichs  $Z$  und der Deckungsbeiträge  $g(x) = c$  mit  $c = 0, 12, 20, 32, 40$



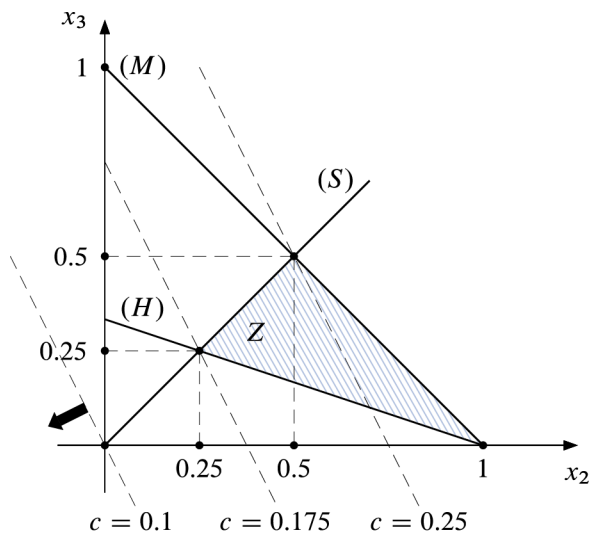

Figur 16.2: Graphische Darstellung des Mischungsproblems  
mit  $\hat{k}(x_2, x_3) = c$  für  $c = 0.1, 0.175, 0.25$

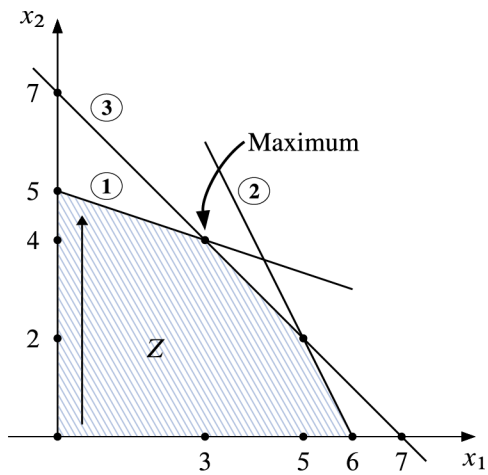

**Figur 16.3:** Basistransformation mit dem Simplexalgorithmus

| Zeile    | Basis    | $a^1 \dots a^j \dots a^n$          | $e_1 \dots e_i \dots e_m$          | $b$      |
|----------|----------|------------------------------------|------------------------------------|----------|
| ①        | $e_1$    | $a_{11} \dots a_{1j} \dots a_{1n}$ | $1 \dots 0 \dots 0$                | $b_1$    |
| $\vdots$ | $\vdots$ | $\vdots \quad \vdots \quad \vdots$ | $\vdots \quad \ddots \quad \vdots$ | $\vdots$ |
| ①        | $e_i$    | $a_{i1} \dots a_{ij} \dots a_{in}$ | $0 \dots 1 \dots 0$                | $b_i$    |
| $\vdots$ | $\vdots$ | $\vdots \quad \vdots \quad \vdots$ | $\vdots \quad \vdots \quad \ddots$ | $\vdots$ |
| ①        | $e_m$    | $a_{m1} \dots a_{mj} \dots a_{mn}$ | $0 \dots 0 \dots 1$                | $b_m$    |
| ①        |          | $-c_1 \dots -c_j \dots -c_n$       | $0 \dots 0 \dots 0$                | $0$      |

**Figur 16.4:** Starttableau zum Standardmaximumproblem mit dem Beschränkungsvektor  $b \geq 0$

| Zeile    | Basis    | $a^1$                                   | $\dots$ | $a^j$    | $\dots$ | $a^n$                                   | $e_1$    | $\dots$ | $e_i$                      | $\dots$ | $e_m$    | $b$                               | Pivot-<br>spalte | Pivot-<br>zeile      |
|----------|----------|-----------------------------------------|---------|----------|---------|-----------------------------------------|----------|---------|----------------------------|---------|----------|-----------------------------------|------------------|----------------------|
| ①        | $e_1$    | $a_{11}$                                | $\dots$ | $a_{1j}$ | $\dots$ | $a_{1n}$                                | 1        | $\dots$ | 0                          | $\dots$ | 0        | $b_1$                             | $j$              | $i$                  |
| $\vdots$ | $\vdots$ | $\vdots$                                |         | $\vdots$ |         | $\vdots$                                | $\vdots$ |         | $\vdots$                   |         | $\vdots$ | $\vdots$                          |                  |                      |
| ①        | $e_i$    | $a_{i1}$                                | $\dots$ | $a_{ij}$ | $\dots$ | $a_{in}$                                | 0        | $\dots$ | 1                          | $\dots$ | 0        | $b_i$                             | $-c_j$           | $\frac{b_i}{a_{ij}}$ |
| $\vdots$ | $\vdots$ | $\vdots$                                |         | $\vdots$ |         | $\vdots$                                | $\vdots$ |         | $\vdots$                   |         | $\vdots$ | $\vdots$                          |                  |                      |
| ②        | $e_m$    | $a_{m1}$                                | $\dots$ | $a_{mj}$ | $\dots$ | $a_{mn}$                                | 0        | $\dots$ | 0                          | $\dots$ | 1        | $b_m$                             | mini-<br>mal     | mini-<br>mal         |
| ②'       |          | $-c_1$                                  | $\dots$ | $-c_j$   | $\dots$ | $-c_n$                                  | 0        | $\dots$ | 0                          | $\dots$ | 0        | 0                                 |                  |                      |
| ②+1      | $e_1$    | $a_{11} - a_{1j} \frac{a_{i1}}{a_{ij}}$ | $\dots$ | 0        | $\dots$ | $a_{1n} - a_{1j} \frac{a_{in}}{a_{ij}}$ | 1        | $\dots$ | $-a_{1j} \frac{1}{a_{ij}}$ | $\dots$ | 0        | $b_1 - a_{1j} \frac{b_i}{a_{ij}}$ |                  |                      |
| $\vdots$ | $\vdots$ | $\vdots$                                |         | $\vdots$ |         | $\vdots$                                | $\vdots$ |         | $\vdots$                   |         | $\vdots$ | $\vdots$                          |                  |                      |
| ②+i      | $a^j$    | $\frac{a_{i1}}{a_{ij}}$                 | $\dots$ | 1        | $\dots$ | $\frac{a_{in}}{a_{ij}}$                 | 0        | $\dots$ | $\frac{1}{a_{ij}}$         | $\dots$ | 0        | $\frac{b_i}{a_{ij}}$              |                  |                      |
| $\vdots$ | $\vdots$ | $\vdots$                                |         | $\vdots$ |         | $\vdots$                                | $\vdots$ |         | $\vdots$                   |         | $\vdots$ | $\vdots$                          |                  |                      |
| ②m       | $e_m$    | $a_{m1} - a_{mj} \frac{a_{i1}}{a_{ij}}$ | $\dots$ | 0        | $\dots$ | $a_{mn} - a_{mj} \frac{a_{in}}{a_{ij}}$ | 0        | $\dots$ | $-a_{mj} \frac{1}{a_{ij}}$ | $\dots$ | 1        | $b_m - a_{mj} \frac{b_i}{a_{ij}}$ |                  |                      |
| ②m'      |          | $-c_1 + c_j \frac{a_{i1}}{a_{ij}}$      | $\dots$ | 0        | $\dots$ | $-c_n + c_j \frac{a_{in}}{a_{ij}}$      | 0        | $\dots$ | $c_j \frac{1}{a_{ij}}$     | $\dots$ | 0        | $c_j \frac{b_i}{a_{ij}}$          |                  |                      |

**Figur 16.5:** Basistransformation für das Standardmaximumproblem mit  $b \geq 0$

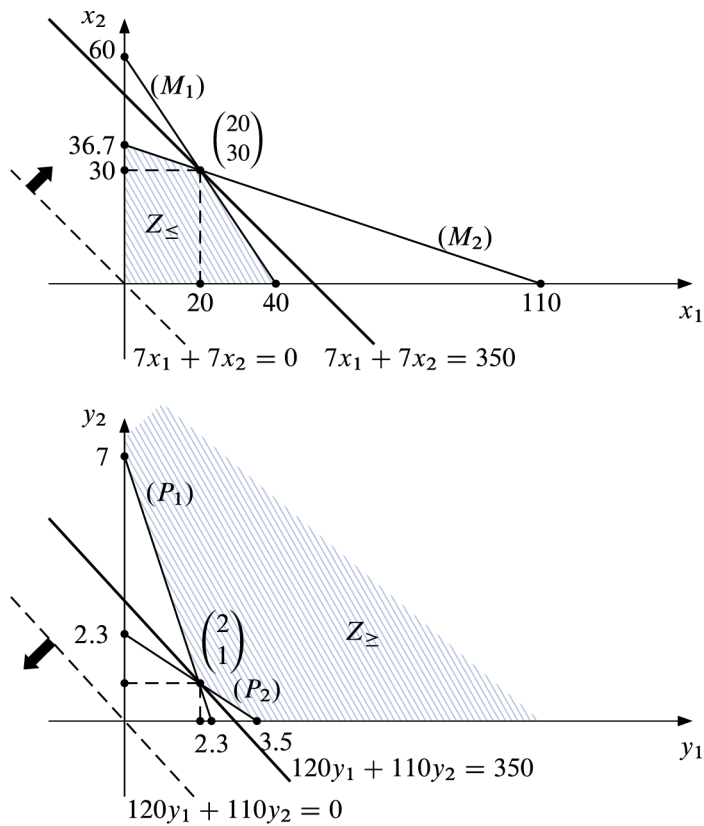

**Figur 16.6:** Graphische Lösung dualer linearer Optimierungsprobleme

$$\det A = \begin{pmatrix} a_{11} & a_{12} \\ a_{21} & a_{22} \end{pmatrix}$$

**Figur 17.1:** Sarrus-Regel für 2 x 2 -Matrizen

$$\det A = \begin{vmatrix} a_{11} & a_{12} & a_{13} \\ a_{21} & a_{22} & a_{23} \\ a_{31} & a_{32} & a_{33} \end{vmatrix}$$

**Figur 17.2:** Sarrus-Regel für 3 x 3 -Matrizen

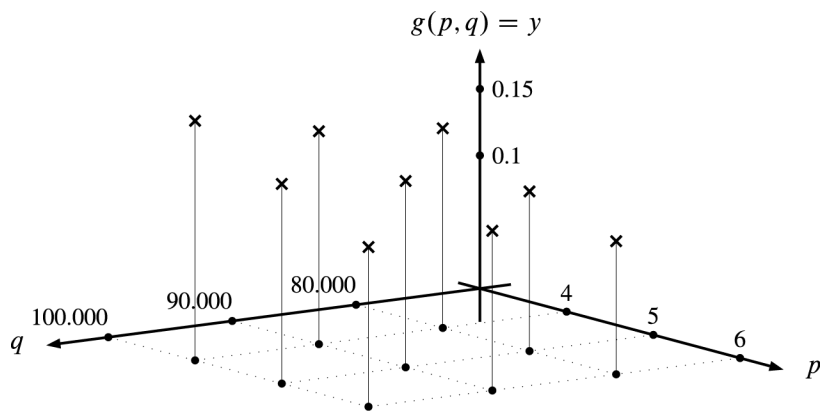

Figur 19.1: Graph der Funktion  $g: D_1 \times D_2 \rightarrow \mathbb{R}$



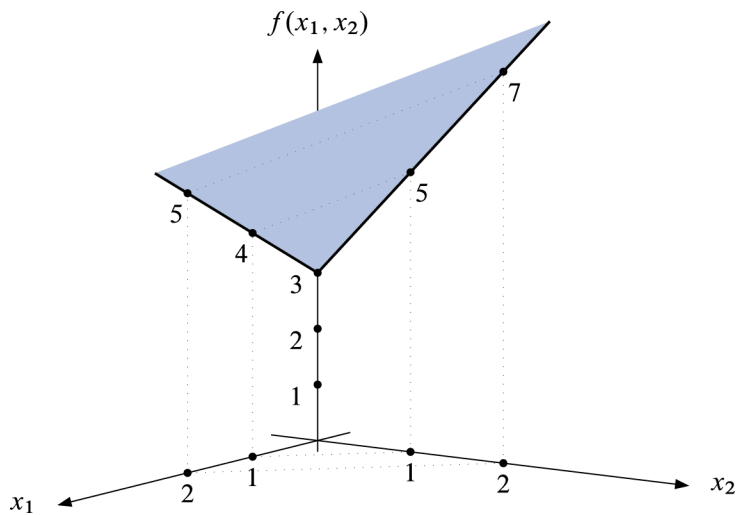

**Figur 19.2:** Graph der Funktion  $k$  mit  $k(x_1, x_2) = 3 + x_1 + 2x_2$

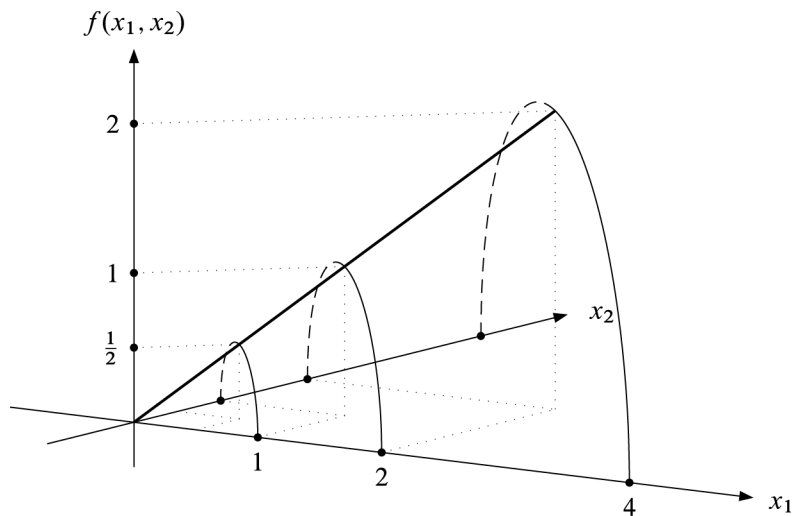

Figur 19.3: Graph der Funktion  $f$  mit  $f(x_1, x_2) = \sqrt{x_1 x_2}$

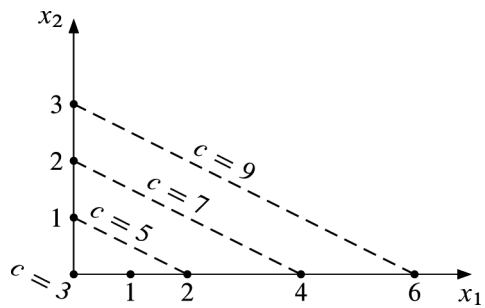

**Figur 19.4:** Niveaulinien der Funktion  $k$  mit  $k(x_1, x_2) = 3 + x_1 + 2x_2$

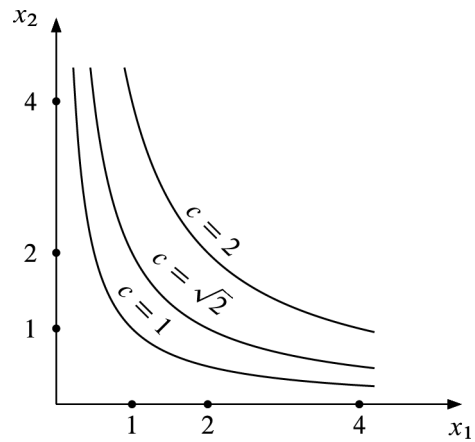

Figur 19.5: Niveaulinien der Funktion  $f$  mit  $f(x_1, x_2) = \sqrt{x_1 x_2}$

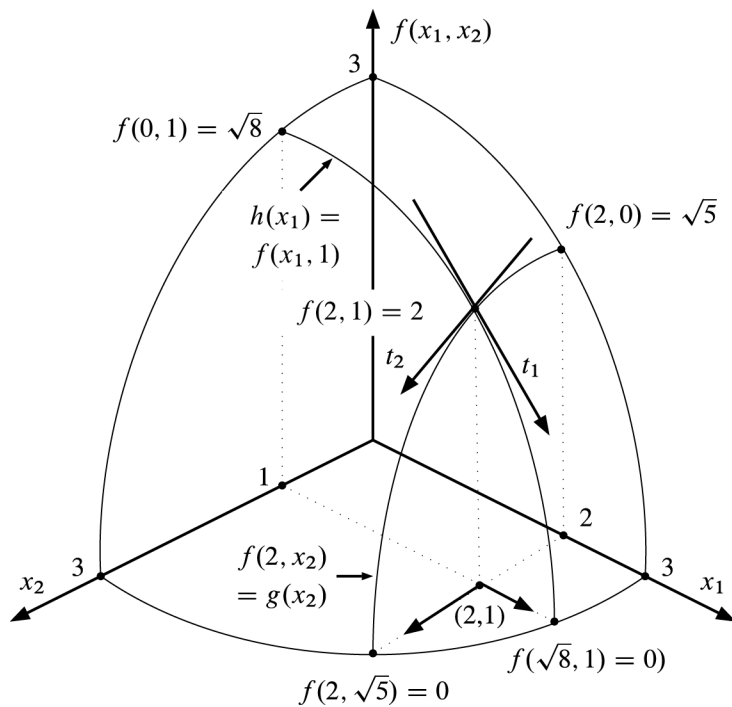

**Figur 19.6:** Differentiation einer reellen Funktion mit zwei Variablen  $x_1, x_2$

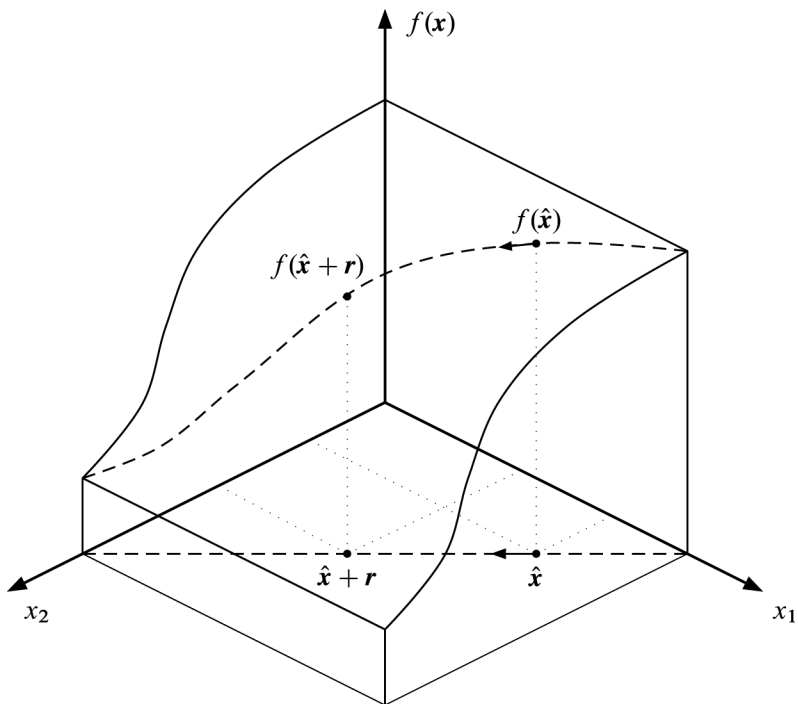

Figur 19.7: Zur Bestimmung der Richtungsableitung einer Funktion  $f$  an der Stelle  $\hat{x}$  in Richtung  $r$

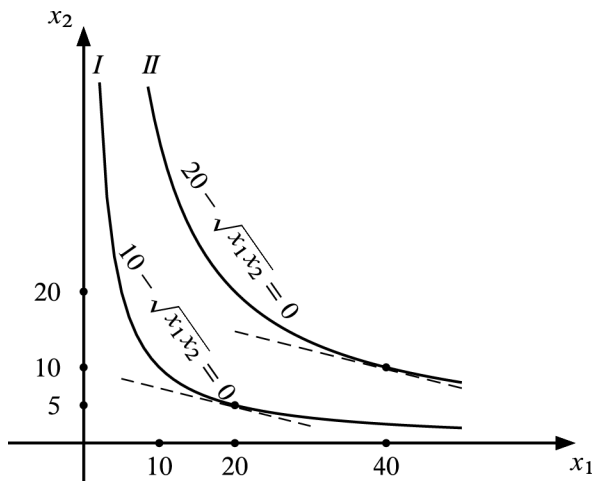

Figur 19.8: Graphen der Produktionsgleichungen  $10 = \sqrt{x_1 x_2}$  und  $20 = \sqrt{x_1 x_2}$

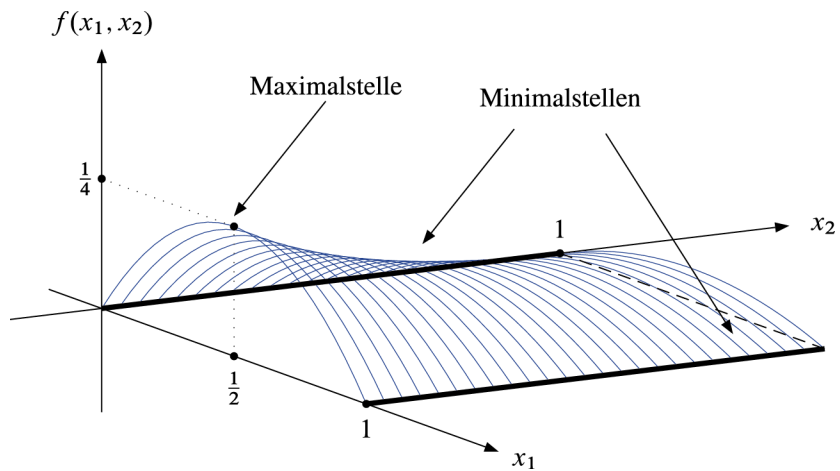

Figur 20.1: Extremalstellen der Funktion  $f$  mit  $f(x_1, x_2) = \frac{x_1(1-x_1)}{\sqrt{x_2+1}}$



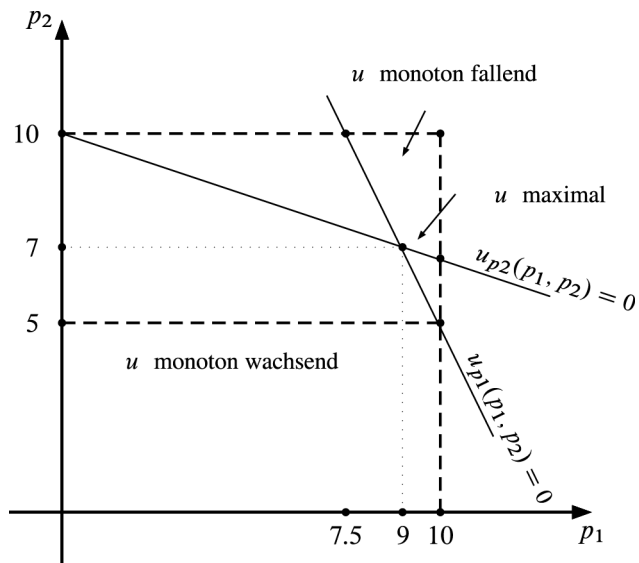

**Figur 20.2:** Zur Kurvendiskussion der Funktion  $u$

| $t$    | 1 | 2  | 3 | 4  | 5  |
|--------|---|----|---|----|----|
| Absatz | 5 | 10 | 9 | 12 | 14 |

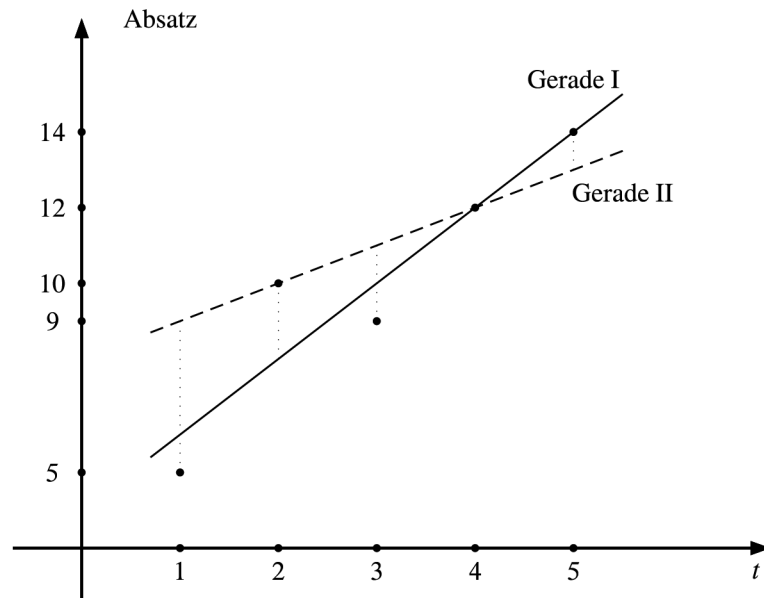

**Figur 20.3:** Beispiel einer Zeitreihe

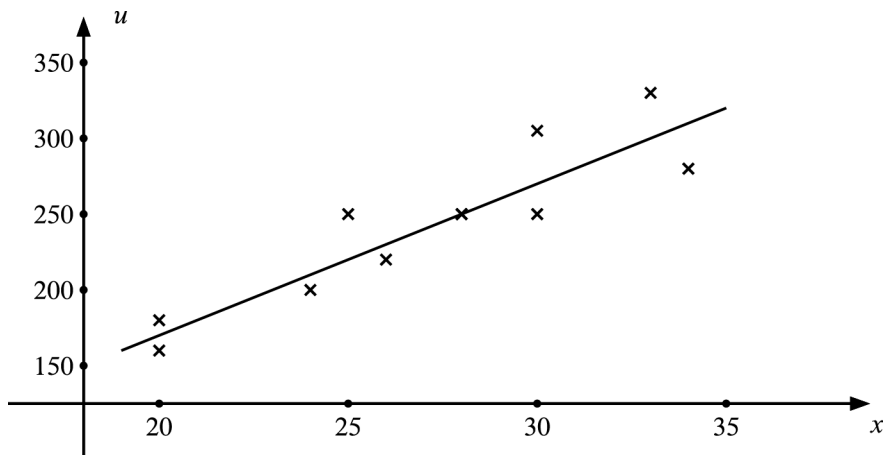

**Figur 20.4:** Einfache lineare Regression

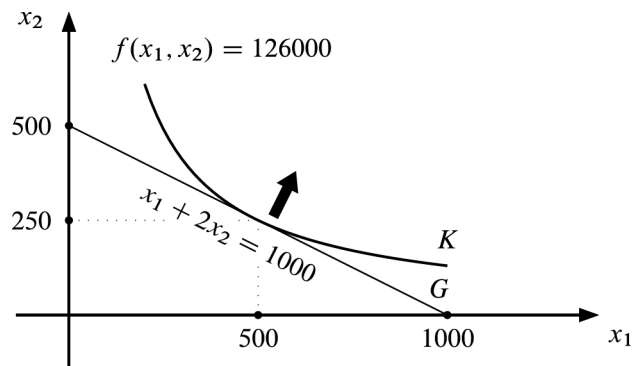

**Figur 20.5:** Maximum einer nichtlinearen Zielfunktion mit einer linearen Gleichung als Nebenbedingung

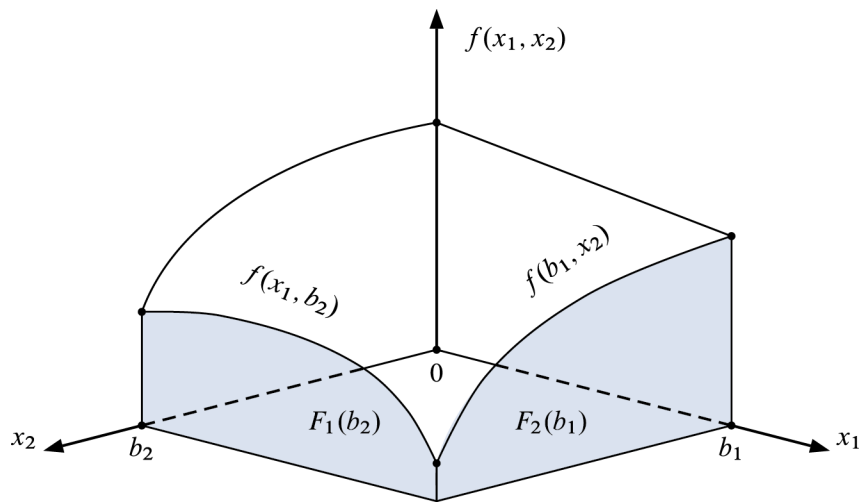

**Figur 21.1:** Graph einer Funktion  $f$  und der Parameterintegrale  $F_1(x_2)$ ,  $F_2(x_1)$  für  $x_2 = b_2$ ,  $x_1 = b_1$  und  $a_1 = a_2 = 0$

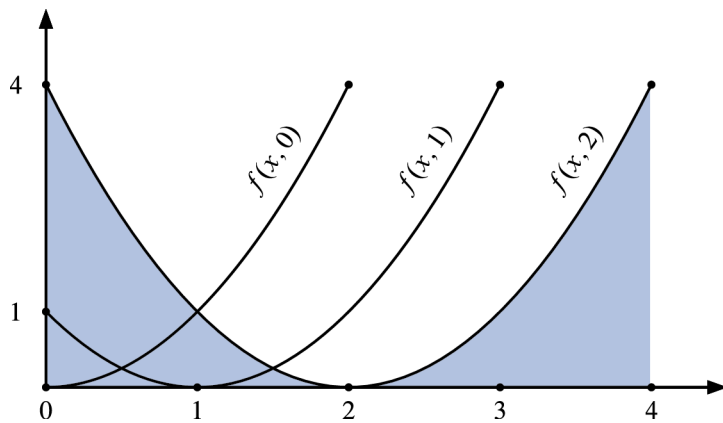

**Figur 21.2:** Graph der Funktion  $f$  für  $t = 0, 1, 2$

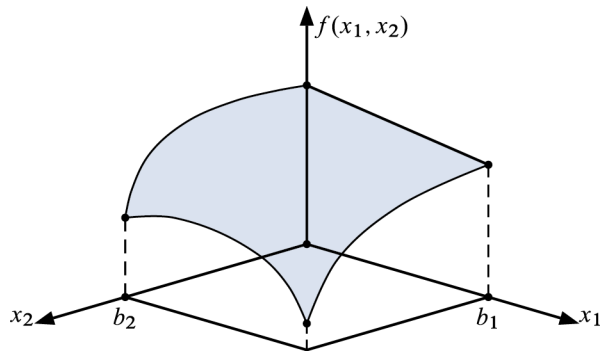

**Figur 21.3:** Rauminhalt zwischen dem Graphen von  $f$  und dem Rechteck  $[a_1, b_1] \times [a_2, b_2]$  der  $x_1 - x_2$ -Ebene mit  $a_1 = a_2 = 0$

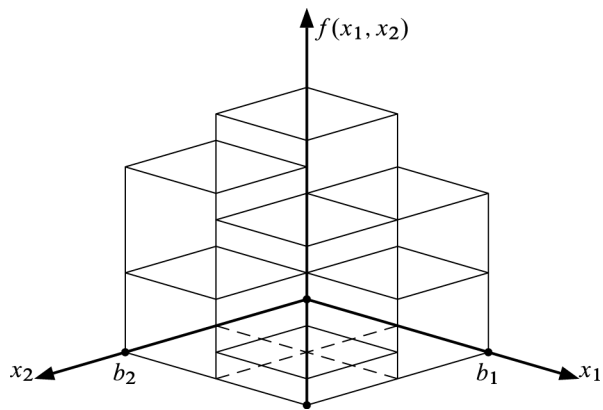

**Figur 21.4:** Unter- und Oberschränken des Rauminhalts für  $n = 2$



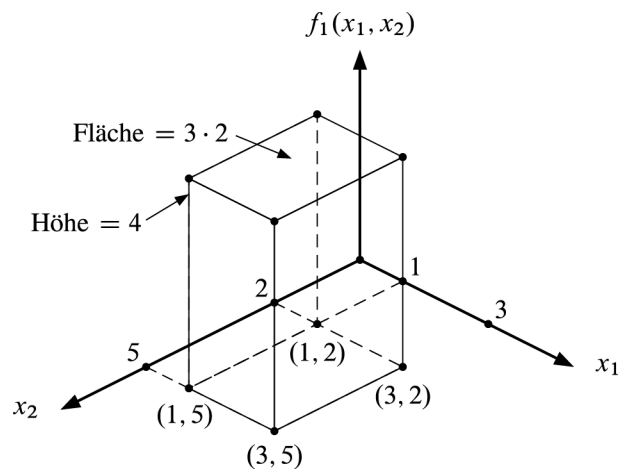

**Figur 21.5:** Gesuchtes Volumen =  $(5 - 2)(3 - 1)4 = 24$

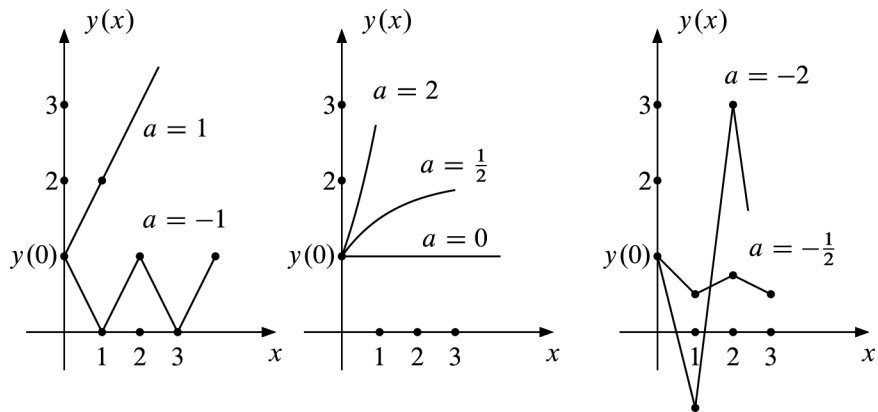

**Figur 22.1:** Graphen der Lösung von  $y(x + 1) = ay(x) + 1$  für  $y(0) = 1$

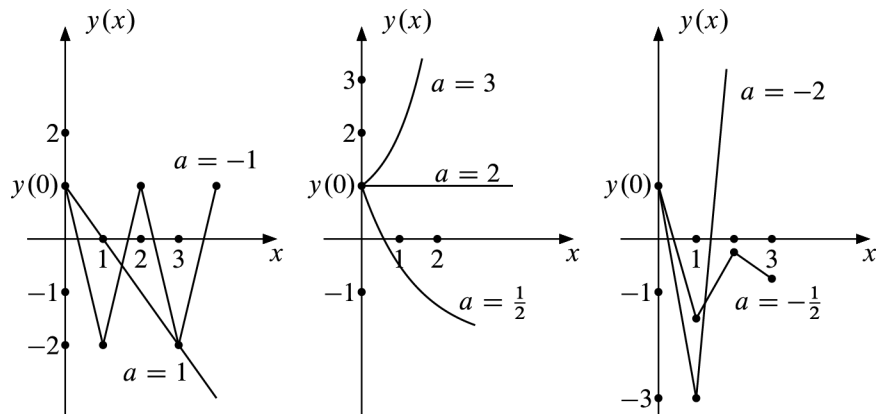

**Figur 22.2:** Graphen der Lösung von  $y(x + 1) = ay(x) - 1$  für  $y(0) = 1$

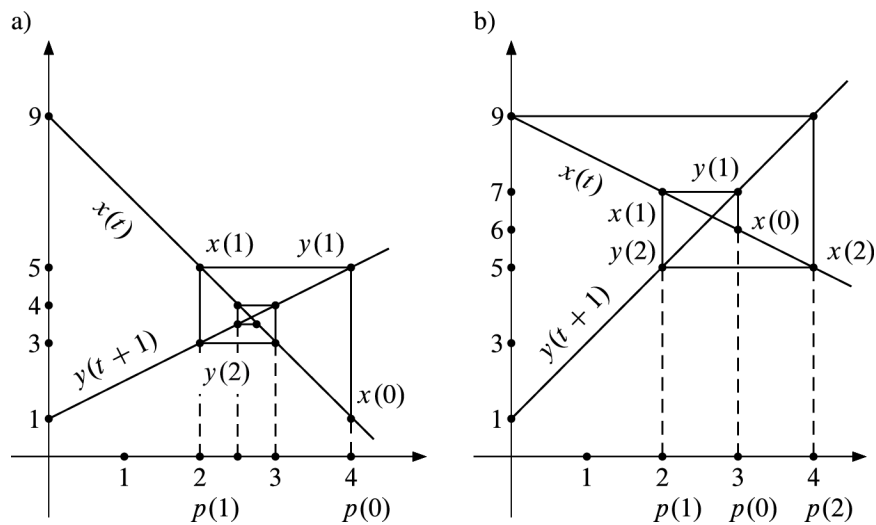

**Figur 22.3:** Konvergenz und Divergenz beim Cobwebmodell (Spinnwebmodell)

$$y(x) = \begin{cases} \frac{3}{a}(e^{ax} - 1) & \text{für } a \neq 0 \\ 3x & \text{für } a = 0 \end{cases}.$$

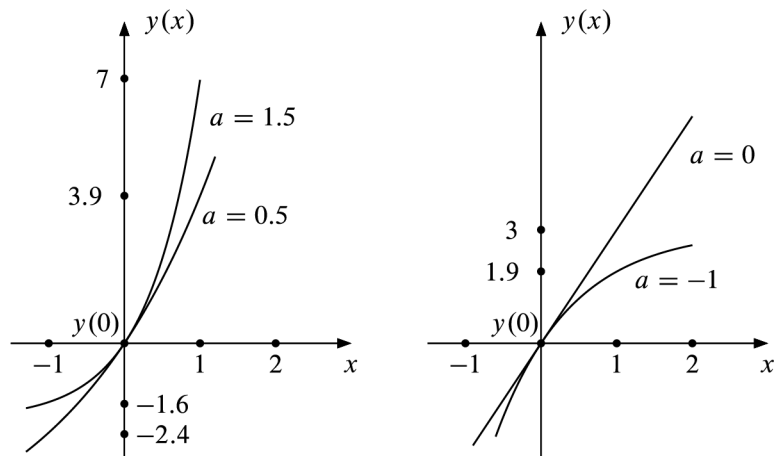

**Figur 22.4:** Graphen der Lösung von  $y'(x) = ay(x) + 3$  für  $y(0) = 0$

| Differenzengleichung                                                                                                                      | Differentialgleichung                                                                                                                     |
|-------------------------------------------------------------------------------------------------------------------------------------------|-------------------------------------------------------------------------------------------------------------------------------------------|
| $y(x+1) - y(x) = ay(x) + b$<br>bzw. $y(x+1) = (1+a)y(x) + b$                                                                              | $y'(x) = ay(x) + b$                                                                                                                       |
| Lösung (Satz 22.6):<br>$y(x) = y(0) + bx$ für $a = 0$<br>$y(x) = -\frac{b}{a} + \left(y(0) + \frac{b}{a}\right)(1+a)^x$<br>für $a \neq 0$ | Lösung (Satz 22.12):<br>$y(x) = y(0) + bx$ für $a = 0$<br>$y(x) = -\frac{b}{a} + \left(y(0) + \frac{b}{a}\right)e^{ax}$<br>für $a \neq 0$ |

**Figur 22.5:** Lineare Differenzen- und Differentialgleichungen erster Ordnung und ihre Lösung für den Fall, dass  $a$  und  $b$  konstant sind

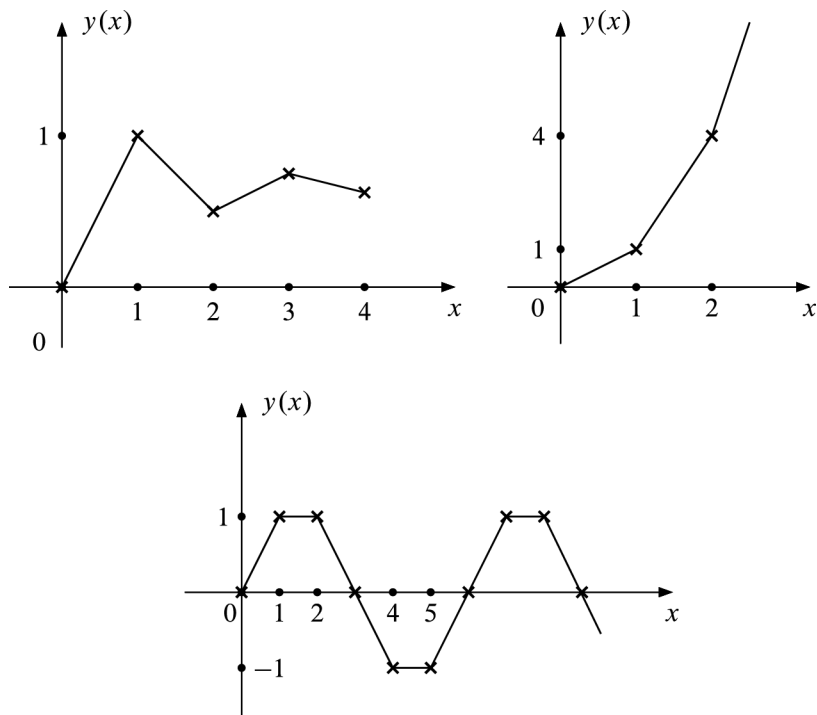

**Figur 23.1:** Graphen der speziellen Lösungen aus Beispiel 23.5

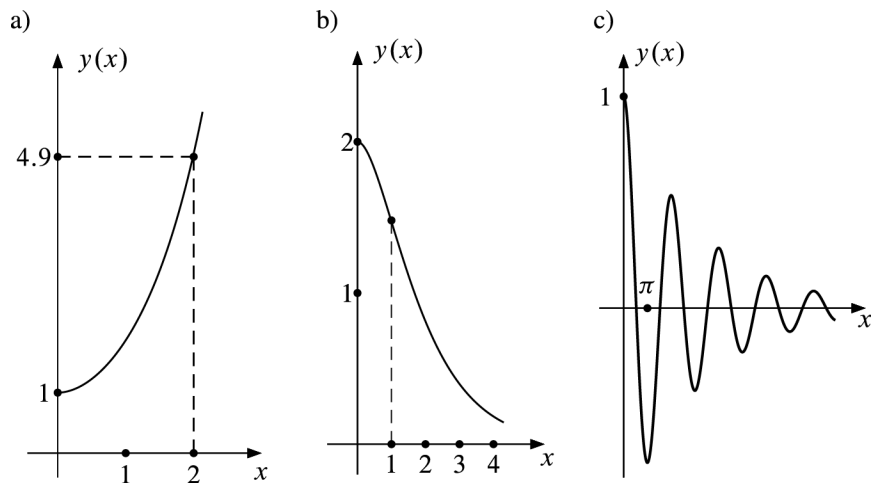

**Figur 23.2:** Graphen der speziellen Lösungen aus Beispiel 23.6



| Nullstellen der charakteristischen Gleichung                                                                                           | unabhängige spezielle Lösungen der homogenen Differenzgleichung                                                                                                                                                     | unabhängige spezielle Lösungen der homogenen Differentialgleichung                                                          |
|----------------------------------------------------------------------------------------------------------------------------------------|---------------------------------------------------------------------------------------------------------------------------------------------------------------------------------------------------------------------|-----------------------------------------------------------------------------------------------------------------------------|
| Nullstelle $\lambda_0$ einfach, reell                                                                                                  | $y(x) = \lambda_0^x$                                                                                                                                                                                                | $y(x) = e^{\lambda_0 x}$                                                                                                    |
| Nullstelle $\lambda_0$ $k$ -fach, reell                                                                                                | $y_j(x) = x^{j-1} \lambda_0^x$<br>( $j = 1, \dots, k$ )                                                                                                                                                             | $y_j(x) = x^{j-1} e^{\lambda_0 x}$<br>( $j = 1, \dots, k$ )                                                                 |
| Nullstellen $\lambda_1, \lambda_2$ einfach, konjugiert komplex mit<br>$\lambda_1 = \alpha + i\beta$<br>$\lambda_2 = \alpha - i\beta$   | $y_1(x) = r^x \cos x\varphi$<br>$y_2(x) = r^x \sin x\varphi$<br>$r = \sqrt{\alpha^2 + \beta^2}$<br>$\cos \varphi = \frac{\alpha}{r}, \sin \varphi = \frac{\beta}{r}$                                                | $y_1(x) = e^{\alpha x} \cos \beta x$<br>$y_2(x) = e^{\alpha x} \sin \beta x$                                                |
| Nullstellen $\lambda_1, \lambda_2$ $k$ -fach, konjugiert komplex mit<br>$\lambda_1 = \alpha + i\beta$<br>$\lambda_2 = \alpha - i\beta$ | $y_{1j}(x) = x^{j-1} r^x \cos x\varphi$<br>$y_{2j}(x) = x^{j-1} r^x \sin x\varphi$<br>( $j = 1, \dots, k$ )<br>$r = \sqrt{\alpha^2 + \beta^2}$<br>$\cos \varphi = \frac{\alpha}{r}, \sin \varphi = \frac{\beta}{r}$ | $y_{1j}(x) = x^{j-1} e^{\alpha x} \cos \beta x$<br>$y_{2j}(x) = x^{j-1} e^{\alpha x} \sin \beta x$<br>( $j = 1, \dots, k$ ) |

**Figur 23.3:** Spezielle Lösungen homogener linearer Differenzen- und Differentialgleichungen mit konstanten Koeffizienten

| Form von $b(x)$                          |                 | Ansatz für inhomogene Lösung $y_I(x)$           |                 |
|------------------------------------------|-----------------|-------------------------------------------------|-----------------|
| $ba^x$                                   | bei Form (A)    | $za^x$                                          | bei Form (A)    |
| $be^{ax}$                                | bei Form (B)    | $ze^{ax}$                                       | bei Form (B)    |
| $b_1 \sin ax + b_2 \cos ax$              | bei (A) und (B) | $z_1 \sin ax + z_2 \cos ax$                     | bei (A) und (B) |
| $b_0 + b_1 x + \dots + b_m x^m$          | bei (A) und (B) | $z_0 + z_1 x + \dots + z_m x^m$                 | bei (A) und (B) |
| mit $a, b, b_0, b_1, \dots, b_m$ gegeben |                 | mit $a$ gegeben, $z, z_0, \dots, z_m$ unbekannt |                 |

**Figur 23.4:** Spezialfälle für einen Störgliedansatz

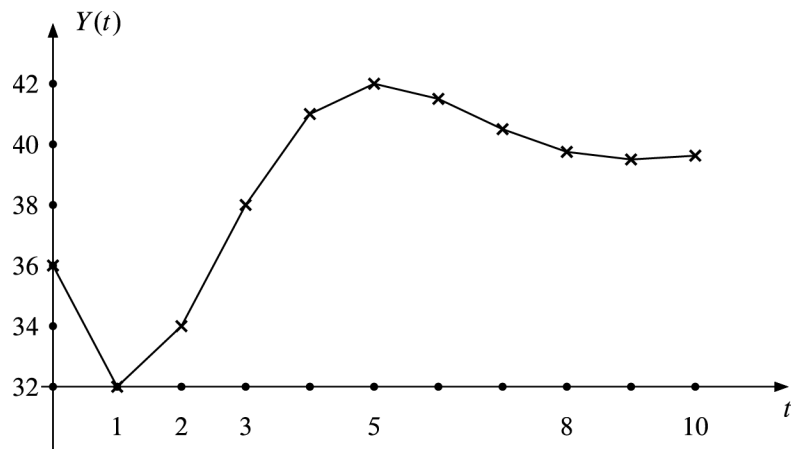

**Figur 23.5:** Graph der Lösung von  $Y(t) - Y(t-1) + \frac{1}{2}Y(t) = 20$   
mit  $Y(0) = 36, Y(1) = 32$

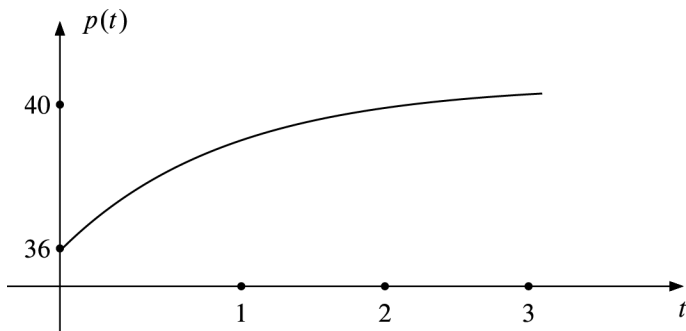

**Figur 23.6:** Graph der Lösung von  $p'' + 1.5p' + 0.5p = 20$  mit  $p(0) = 36$ ,  $p'(0) = 4$
